# Supplementary material for: Tuning the properties of α,ω-bis(trialkoxysilyl) telechelic copolyolefins from ruthenium-catalyzed chain-transfer ring-opening metathesis polymerization (ROMP)
Source: Royal Society of Chemistry journal article supplement (doi:10.1039/c6py02092e), 2017-01-01
Supplement: c6py02092e1.pdf [file c6py02092e1.pdf]

**Supporting Information for**  
**Tuning Properties of  $\alpha,\omega$ -Bis(trialkoxysilyl) Telechelic Copolyolefins from Ruthenium-**  
**Catalyzed Chain-Transfer Ring-Opening Metathesis Polymerization (ROMP)**

**Table S1.** Apparent physical state and thermal analysis of different homopolyolefins synthesized by ROMP/CM using CTA **1** and catalyst **G2** in CH<sub>2</sub>Cl<sub>2</sub> at 40 °C for 24 h; [Monomer]<sub>0</sub>/[CTA]<sub>0</sub>/[**G2**]<sub>0</sub> = 2000:100:1.

**Scheme S1.** Different microstructures of PDCPD obtained from ROMP of DCPD.

**Table S2.** Copolymerization of NB-OLF and mOLF catalyzed by **G2** using CTA **1** in CH<sub>2</sub>Cl<sub>2</sub> during 24 h\*.

**Fig. S1.** SEC traces of copolyolefin samples prepared from the ROMP of NB/COE, NB<sup>COOMe</sup>/COE, DCPD/CDT and DCPD/COD using **G2** catalyst and CTA **1** (Table 1, entries 1, 6, 12, 14).

**Fig. S2.** <sup>1</sup>H NMR spectrum (400 MHz, CDCl<sub>3</sub>, 23 °C) of a crude copolymer prepared from ROMP/CM of NB<sup>COOMe</sup> and COE using **G2** and CTA **1** (Table 1, entry 6).

**Fig. S3.** <sup>13</sup>C NMR spectrum (100 MHz, CDCl<sub>3</sub>, 23 °C) of a crude copolymer prepared from ROMP/CM of NB<sup>COOMe</sup> and COE using **G2** and CTA **1** (Table 1, entry 6).

**Fig. S4.** FTIR spectrum of a crude copolymer prepared from ROMP/CM of NB<sup>COOMe</sup> and COE using **G2** and CTA **1** (Table 1, entry 6).

**Fig. S5.** <sup>1</sup>H NMR spectrum (500 MHz, CDCl<sub>3</sub>, 23 °C) of a crude copolymer prepared from ROMP/CM of oxanB<sup>COOMe</sup> and COE using **G2** and CTA **1** (Table 1, entry 8).

**Fig. S6.** <sup>13</sup>C{<sup>1</sup>H} NMR spectrum (125 MHz, CDCl<sub>3</sub>, 23 °C) of a crude copolymer prepared from ROMP/CM of oxanB<sup>COOMe</sup> and COE using **G2** and CTA **1** (Table 1, entry 8).

**Fig. S7.** FTIR spectrum of a crude copolymer prepared from ROMP/CM of oxanB<sup>COOMe</sup> and COE using **G2** and CTA **1** (Table 1, entry 8).

**Fig. S8.** <sup>1</sup>H NMR spectrum (500 MHz, CDCl<sub>3</sub>, 23 °C) of a crude copolymer prepared from ROMP/CM of NB and CDT using **G2** and CTA **1** (Table 1, entry 3).

**Fig. S9.** <sup>13</sup>C{<sup>1</sup>H} NMR spectrum (125 MHz, CDCl<sub>3</sub>, 23 °C) of a crude copolymer prepared from ROMP/CM of NB and CDT using **G2** and CTA **1** (Table 1, entry 3).

**Fig. S10.** FTIR spectrum of a crude copolymer prepared from ROMP/CM of NB and CDT using **G2** and CTA **1** (Table 1, entry 3).

**Fig.S11.**  $^1\text{H}$  NMR spectrum (400 MHz,  $\text{CDCl}_3$ , 23 °C) of **CNF** copolymer isolated from a crude copolymer prepared from ROMP/CM of NB and CDT using **G2** and CTA **1** (Table 1, entry 3).

**Fig. S12.**  $^{13}\text{C}\{^1\text{H}\}$  NMR spectrum (100 MHz,  $\text{CDCl}_3$ , 23 °C) of **CNF** copolymer isolated from a crude copolymer prepared from ROMP/CM of NB and CDT using **G2** and CTA **1** (Table 1, entry 3).

**Fig.S13.**  $^1\text{H}$  NMR spectrum (400 MHz,  $\text{CDCl}_3$ , 23 °C) of a crude copolymer prepared from ROMP/CM of ENB and CDT using **G2** and CTA **1** (Table 1, entry 4).

**Fig. S14.**  $^{13}\text{C}\{^1\text{H}\}$  NMR spectrum (100 MHz,  $\text{CDCl}_3$ , 23 °C) of a crude copolymer prepared from ROMP/CM of ENB and CDT using **G2** and CTA **1** (Table 1, entry 4).

**Fig.S15.** FTIR spectrum of a crude copolymer prepared from ROMP/CM of ENB and CDT using **G2** and CTA **1** (Table 1, entry 4).

**Fig. S16.**  $^1\text{H}$  NMR spectrum (400 MHz,  $\text{CDCl}_3$ , 23 °C) of **CNF** copolymer isolated from a crude copolymer prepared from ROMP/CM of ENB and CDT using **G2** and CTA **1** (Table 1, entry 4).

**Fig. S17.**  $^{13}\text{C}\{^1\text{H}\}$  NMR spectrum (125 MHz,  $\text{CDCl}_3$ , 23 °C) of **CNF** copolymer isolated from a crude copolymer prepared from ROMP/CM of ENB and CDT using **G2** and CTA **1** (Table 1, entry 4).

**Fig.S18.**  $^1\text{H}$  NMR spectrum (500 MHz,  $\text{CDCl}_3$ , 23 °C) of a crude copolymer prepared from ROMP/CM of DCPD and COE using **G2** and CTA **1** (Table 1, entry 10).

**Fig.S19.**  $^{13}\text{C}\{^1\text{H}\}$  NMR spectrum (125 MHz,  $\text{CDCl}_3$ , 23 °C) of a crude copolymer prepared from ROMP/CM of DCPD and COE using **G2** and CTA **1** (Table 1, entry 10).

**Fig. S20.** FTIR spectrum of a crude copolymer prepared from ROMP/CM of DCPD and COE using **G2** and CTA **1** (Table 1, entry 10).

**Fig. S21.**  $^1\text{H}$  NMR spectrum (500 MHz,  $\text{CDCl}_3$ , 23 °C) of **CNF** copolymer isolated from a crude copolymer prepared from ROMP/CM of DCPD and COE using **G2** and CTA **1** (Table 1, entry 10).

**Fig.S22.**  $^{13}\text{C}\{^1\text{H}\}$  NMR spectrum (125 MHz,  $\text{CDCl}_3$ , 23 °C) of **CNF** copolymer isolated from a crude copolymer prepared from ROMP/CM of DCPD and COE using **G2** and CTA **1** (Table 1, entry 10).

**Fig. S23.**  $^1\text{H}$  NMR spectrum (500 MHz,  $\text{CDCl}_3$ , 23 °C) of a crude copolymer prepared from ROMP/CM of DCPD and CDT using **G2** and CTA **1** (Table 1, entry 12).

**Fig. S24.**  $^{13}\text{C}\{^1\text{H}\}$  NMR spectrum (125 MHz,  $\text{CDCl}_3$ , 23 °C) of a crude copolymer prepared from ROMP/CM of DCPD and CDT using **G2** and CTA **1** (Table 1, entry 12).

**Fig. S25.** FTIR spectrum of a crude copolymer prepared from ROMP/CM of DCPD and CDT using **G2** and CTA **1** (Table 1, entry 12).

**Fig. S26.**  $^1\text{H}$  NMR spectrum (500 MHz,  $\text{CDCl}_3$ , 23 °C) of a crude copolymer prepared from ROMP/CM of DCPD and COD using **G2** and CTA **1** (Table 1, entry 14).

**Fig. S27.**  $^{13}\text{C}\{^1\text{H}\}$  NMR spectrum (125 MHz,  $\text{CDCl}_3$ , 23 °C) of a crude copolymer prepared from ROMP/CM of DCPD and COD using **G2** and CTA **1** (Table 1, entry 14).

**Fig. S28.** FTIR spectrum of a crude copolymer prepared from ROMP/CM of DCPD and COD using **G2** and CTA **1** (Table 1, entry 14).

**Fig. S29.**  $^1\text{H}$  NMR spectrum (500 MHz,  $\text{CDCl}_3$ , 23 °C) of **CNF** copolymer isolated from a crude copolymer prepared from ROMP/CM of DCPD and COD using **G2** and CTA **1** (Table 1, entry 14).

**Fig. S30.**  $^{13}\text{C}\{^1\text{H}\}$  NMR spectrum (125 MHz,  $\text{CDCl}_3$ , 23 °C) of **CNF** copolymer isolated from a crude copolymer prepared from ROMP/CM of DCPD and COD using **G2** and **CTA 1** (Table 1, entry 14).

**Fig. S31.**  $^1\text{H}$  NMR spectrum (400 MHz,  $\text{CDCl}_3$ , 23 °C) of **CNF** copolymer isolated from a crude copolymer prepared from ROMP/CM of NB and COE using **G2** and **CTA 1-OEt** (Table 1, entry 1).

**Fig. S32.**  $^{13}\text{C}$  NMR spectrum (100 MHz,  $\text{CDCl}_3$ , 23 °C) of **CNF** copolymer isolated from a crude copolymer prepared from ROMP/CM of NB and COE using **G2** and **CTA 1-OEt** (Table 1, entry 1).

**Fig. S33.**  $^1\text{H}$ - $^{13}\text{C}\{^1\text{H}\}$  HMBC (DEPT) NMR spectrum (400 MHz,  $\text{CDCl}_3$ , 23 °C) of a crude copolymer prepared from ROMP/CM of NB and COE using **G2** and **CTA 1** (Table 1, entry 1).

**Fig. S34.**  $^1\text{H}$ - $^{13}\text{C}$  HMBC (DEPT) NMR spectrum (400 MHz,  $\text{CDCl}_3$ , 23 °C) of a crude copolymer prepared from ROMP/CM of NB and CDT using **G2** and **CTA 1** (Table 1, entry 3; spectrum with assignments of all signals in Fig. S35).

**Fig. S35.**  $^1\text{H}$ - $^{13}\text{C}$  HMBC (DEPT) NMR spectrum (400 MHz,  $\text{CDCl}_3$ , 23 °C) of a crude copolymer prepared from ROMP/CM of NB and CDT using **G2** and **CTA 1** (Table 1, entry 3).

**Fig. S36.**  $^1\text{H}$ - $^{13}\text{C}$  HMBC (DEPT) NMR spectrum (400 MHz,  $\text{CDCl}_3$ , 23 °C) of a crude copolymer prepared from ROMP/CM of ENB and CDT using **G2** and **CTA 1** (Table 1, entry 4; spectrum with assignments of all signals in Fig. S37).

**Fig. S37.**  $^1\text{H}$ - $^{13}\text{C}$  HMBC (DEPT) NMR spectrum (400 MHz,  $\text{CDCl}_3$ , 23 °C) of a crude copolymer prepared from ROMP/CM of ENB and CDT using **G2** and **CTA 1** (Table 1, entry 4).

**Fig. S38.**  $^1\text{H}$ - $^{13}\text{C}$  HMBC (DEPT) NMR spectrum (400 MHz,  $\text{CDCl}_3$ , 23 °C) of a crude copolymer prepared from ROMP/CM of  $\text{oxaNB}^{\text{COOMe}}$  and COE using **G2** and CTA **1** (Table 1, entry 8; spectrum with assignments of all signals in Fig.S39).

**Fig. S39.**  $^1\text{H}$ - $^{13}\text{C}$  HMBC (DEPT) NMR spectrum (400 MHz,  $\text{CDCl}_3$ , 23 °C) of a crude copolymer prepared from ROMP/CM of  $\text{oxaNB}^{\text{COOMe}}$  and COE using **G2** and CTA **1** (Table 1, entry 8).

**Fig. S40.**  $^1\text{H}$ - $^{13}\text{C}$  (DEPT) HMBC NMR spectrum (400 MHz,  $\text{CDCl}_3$ , 23 °C) of a crude copolymer prepared from ROMP/CM of  $\text{oxaNB}^{\text{COOMe}}$ /COE using **G2** and CTA **1** (Table 1, entry 10).

**Fig. S41.** FTIR spectrum of a crude copolymer prepared from ROMP/CM of NB and COE using **G2** and CTA **1** (Table 1, entry 1).

**Fig. S42.** DSC traces of copolyolefin samples prepared from the ROMP/CM of NB/CDT,  $\text{oxaNB}^{\text{COOMe}}$ /COE, DCPD/COE and DCPD/CDT using **G2** catalyst and CTA **1** (Table 2, entries 4, 6, 19, 24, 26, 31).

**Fig. S43.** Flow curves of copolyolefin samples prepared from the ROMP/CM of NB/COE, using **G2** catalyst and CTA **1** (Table 3, entries 1 and 2).

**Fig. S44.** Flow curves of copolyolefin samples prepared from the ROMP/CM of  $\text{NB}^{\text{COOMe}}$ /COE using **G2** catalyst and CTA **1** (Table 3, entries 3–6).

**Fig. S45.** Flow curves of copolyolefin samples prepared from the ROMP/CM of  $\text{oxaNB}^{\text{COOMe}}$ /COE using **G2** catalyst and CTA **1** (Table 3, entries 7–9).

**Fig. S46.** Flow curves of copolyolefin samples prepared from the ROMP/CM of DCPD/COE and DCPD/COD using **G2** catalyst and CTA **1** (Table 3, entries 10–12).

**Fig. S47.**  $^1\text{H}$  NMR spectrum (500 MHz,  $\text{CDCl}_3$ , 23 °C) of  $\text{oxaNB}^{\text{COOMe}}$ .

**Fig. S48.**  $^{13}\text{C}\{^1\text{H}\}$  NMR spectrum (125 MHz,  $\text{CDCl}_3$ , 23 °C) of  $\text{oxaNB}^{\text{COOMe}}$ .

**Table S1.** Apparent physical state and thermal analysis of different homopolyolefins synthesized by ROMP/CM using CTA **1** and catalyst **G2** in CH<sub>2</sub>Cl<sub>2</sub> at 40 °C for 24 h; [Monomer]<sub>0</sub>/[CTA]<sub>0</sub>/[**G2**]<sub>0</sub> = 2000:100:1.

| Entry          | Monomer                | CTA <b>1-R</b> | $M_{n,theo}^b$<br>(g.mol <sup>-1</sup> ) | $M_{n,NMR}^c$<br>(g.mol <sup>-1</sup> ) | Apparent<br>physical state<br>at 23 °C | $T_g^d$<br>(°C) | $T_m^d$<br>(°C) | $T_c^d$<br>(°C) |
|----------------|------------------------|----------------|------------------------------------------|-----------------------------------------|----------------------------------------|-----------------|-----------------|-----------------|
| 1              | COE                    | <b>OMe</b>     | 2200                                     | 2900                                    | Solid                                  | -78             | 52              | 45              |
| 2              | CDT                    | <b>OEt</b>     | 3200                                     | 3200                                    | Solid                                  | <i>n.o.</i>     | 32              | 22              |
| 3              | COD                    | <b>OEt</b>     | 2200                                     | 2500                                    | Solid                                  | <i>n.o.</i>     | 32              | 21              |
| 4              | NB                     | <b>OEt</b>     | 3800                                     | 4500                                    | Solid                                  | 32              | -               | -               |
| 5              | ENB                    | <b>OEt</b>     | -                                        | -                                       | Solid                                  | 110             | -               | -               |
| 6 <sup>a</sup> | DCPD                   | <b>OMe</b>     | -                                        | -                                       | Solid                                  | 155             | -               | -               |
| 7              | NB <sup>COOMe</sup>    | <b>OMe</b>     | 3000                                     | 2300                                    | Liquid                                 | -12             | -               | -               |
| 8              | oxaNb <sup>COOMe</sup> | <b>OMe</b>     | 3100                                     | 3500                                    | Liquid                                 | -2              | -               | -               |

<sup>a</sup> ROMP of DCPD was performed at 23 °C. <sup>b</sup> Theoretical molar mass value calculated from  $M_{n,theo} = M_{monomer} \times (\text{Conv.monomer} \times [\text{monomer}]_0) / (\text{Conv.CTA} \times [\text{CTA}]_0)$ , on the basis of the sole formation of functionalized copolymers, i.e. without taking into account any **CNF**. <sup>c</sup> Experimental molar mass value determined by <sup>1</sup>H NMR analysis (refer to the Experimental Section). In entries 1–4, 7 and 8, quantitative monomer and CTA conversion was observed by <sup>1</sup>H NMR analysis. In entries 5 and 6, quantitative monomer conversion was observed by <sup>1</sup>H NMR analysis; yet, the CTA was not consumed at all, thus precluding the determination of NMR molar mass values. <sup>d</sup> DSC experiments recorded according to the following cycles: -100 to +100 °C at 10 °C min<sup>-1</sup>; +100 to -100 °C at 10 °C min<sup>-1</sup>. *n.o.* = not observed.

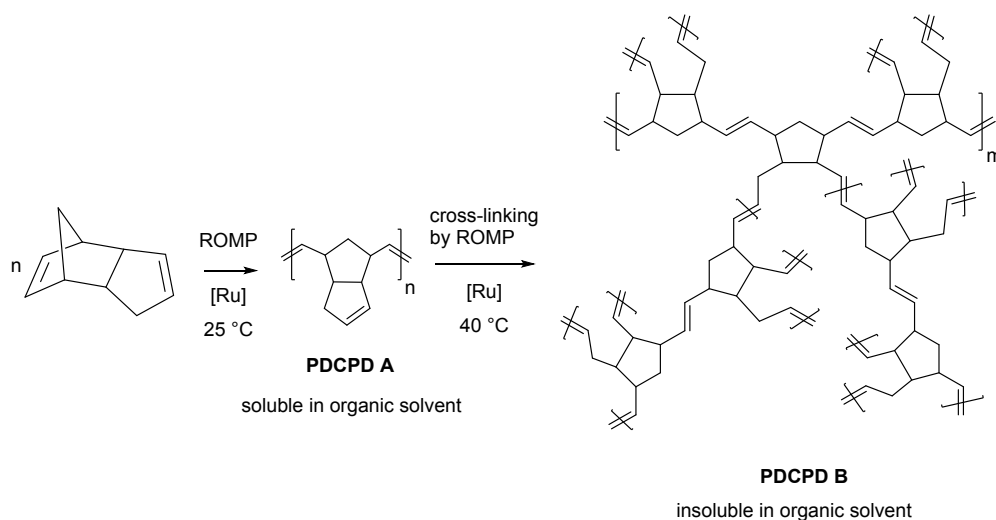

**Scheme S1.** Different microstructures of PDCPD obtained from the ROMP of DCPD. [ Le Gac, P. Y.; Choqueuse, D.; Paris, M.; Recher, G.; Zimmer, C.; Melot, D. *Polym. Degrad. Stabil.*, **2013**, *98*, 809–817; Mohite, D. P.; Mahadik-Khanolkar, S.; Luo, H.; Lu, H.; Sotiriou-Leventis, C.; Leventis, N. *Soft Matter*, **2013**, *9*, 1516–1530; Davidson, T. A.; Wagener, K. B.; Priddy, D. B. *Macromolecules*, **1996**, *29*, 786–788; Yang, Y.-S. *Polymer*, **1997**, *38*, 1121–1130.]

Due to the different ring strain, the ROMP of DCPD usually first occurs via opening of the NB unit leading to **PDCPD A**, which is soluble in usual organic solvents. Then, cyclopentene rings can open, thus forming a cross-linked PDCPD network (**PDCPD B**). Copolymers containing **PDCPD B** are rigid (not liquid) at room temperature, and are thus not suitable for adhesive applications. Decreasing the reaction temperature to room temperature was found to enable the sole formation of **PDCPD A**. Therefore, all copolymerizations using DCPD as a comonomer were performed at 23 °C.



**Table S2.** Copolymerization of NB-OLF and mOLF catalyzed by **G2** using CTA **1** in CH<sub>2</sub>Cl<sub>2</sub> during 24 h.\*

| Entry           | Reaction Temp.<br>(°C) | NB-OLF /mOLF                | [NB-OLF] <sub>0</sub> : [mOLF] <sub>0</sub> | R-CTA <b>1</b> | [CTA <b>1</b> ] <sub>0</sub> (equiv vs <b>G2</b> ) | NB-OLF Conv. <sup>a</sup> (mol%) | mOLF Conv. <sup>a</sup> (mol%) | DF Sel. <sup>b</sup> (wt%) | CNF Sel. <sup>b</sup> (wt%) | $M_{n,theo}^c$ | $M_{n,NMR}^d$ ( <b>DF</b> , <b>CNF</b> ) |        | $M_{n,SEC}^e$ | $D_M^e$ | $M_{n,SEC}^e$ ( <b>CNF</b> ) | $D_M^e$ ( <b>CNF</b> ) |
|-----------------|------------------------|-----------------------------|---------------------------------------------|----------------|----------------------------------------------------|----------------------------------|--------------------------------|----------------------------|-----------------------------|----------------|------------------------------------------|--------|---------------|---------|------------------------------|------------------------|
|                 |                        |                             |                                             |                |                                                    |                                  |                                |                            |                             |                | (g.mol <sup>-1</sup> )                   |        |               |         |                              |                        |
| 1               | 40                     | NB/COE                      | 1000:1000                                   | <b>OEt</b>     | 50                                                 | 100                              | 100                            | 97                         | 3                           | 4 100          | 4 100                                    | 10 700 | 1.7           | 13 200  | 1.5                          |                        |
| 2               | 40                     | NB/COE                      | 25 000:25 000                               | <b>OEt</b>     | 1 250                                              | 100                              | 100                            | 83                         | 17                          | 4 100          | 4 500                                    | 21 700 | 1.7           | 22 800  | 1.6                          |                        |
| 3               | 40                     | NB/CDT                      | 25 000:25 000                               | <b>OEt</b>     | 1 250                                              | 100                              | 100                            | 94                         | 6                           | 5 100          | 5 900                                    | 15 500 | 1.7           | 24 100  | 1.3                          |                        |
| 6               | 40                     | ENB/CDT                     | 1000:1000                                   | <b>OEt</b>     | 50                                                 | 100                              | 100                            | 90                         | 10                          | 5 600          | 5 200                                    | 7 800  | 2.0           | 10 500  | 2.1                          |                        |
| 7               | 40                     | ENB/CDT                     | 25 000:25 000                               | <b>OEt</b>     | 425                                                | 100                              | 100                            | 82                         | 18                          | 16 600         | 17 200                                   | 27 200 | 1.9           | 31 000  | 1.7                          |                        |
| 8               | 40                     | NB <sup>COOMe</sup> /COE    | 1000:1000                                   | <b>OMe</b>     | 50                                                 | 100                              | 100                            | 98                         | 2                           | 5 200          | 5 500                                    | 13 600 | 1.5           | 14 400  | 1.5                          |                        |
| 9               | 40                     | NB <sup>COOMe</sup> /COE    | 25 000:25 000                               | <b>OMe</b>     | 1 250                                              | 100                              | 100                            | 98                         | 2                           | 5 200          | 5 100                                    | 30 300 | 1.6           | 47 000  | 1.7                          |                        |
| 10              | 40                     | oxaNb <sup>COOMe</sup> /COE | 1000:1000                                   | <b>OMe</b>     | 50                                                 | 100                              | 100                            | 97                         | 3                           | 3 100          | 3 500                                    | 3 200  | 1.6           | 12 100  | 1.3                          |                        |
| 11              | 40                     | oxaNb <sup>COOMe</sup> /COE | 25 000:25 000                               | <b>OMe</b>     | 1 250                                              | 100                              | 100                            | 90                         | 10                          | 2 900          | 4 200                                    | 19 500 | 1.4           | 52 500  | 1.6                          |                        |
| 12              | 40                     | oxaNb <sup>COOMe</sup> /COE | 25 000:25 000                               | <b>OMe</b>     | 1 250                                              | 100                              | 100                            | 91                         | 9                           | 2 900          | 3 900                                    | 24 500 | 1.7           | 48 100  | 1.6                          |                        |
| 13              | 23                     | DCPD/COE                    | 1000:1000                                   | <b>OMe</b>     | 100                                                | 100                              | 100                            | 94                         | 6                           | 2 400          | 3 200                                    | 18 200 | 1.7           | 21 200  | 1.4                          |                        |
| 14              | 23                     | DCPD/COE                    | 25 000:25 000                               | <b>OMe</b>     | 1 250                                              | 97                               | 85                             | 83                         | 17                          | 4 400          | 5 100                                    | 21 000 | 1.8           | 39 600  | 1.8                          |                        |
| 15              | 23                     | DCPD/CDT                    | 1000:1000                                   | <b>OEt</b>     | 100                                                | 100                              | 100                            | 97                         | 3                           | 2 900          | 4 600                                    | 11 200 | 2.0           | 25 000  | 1.5                          |                        |
| 16              | 23                     | DCPD/CDT                    | 25 000:25 000                               | <b>OEt</b>     | 1 250                                              | 92                               | 78                             | 90                         | 10                          | 3 700          | 4 600                                    | 37 000 | 1.9           | 41 000  | 1.4                          |                        |
| 17 <sup>f</sup> | 23                     | DCPD/CDT                    | 25 000:25 000                               | <b>OEt</b>     | 1 250                                              | 100                              | 80                             | 88                         | 12                          | 3 700          | 4 100                                    | 38 600 | 1.9           | 42 300  | 1.5                          |                        |
| 18              | 23                     | DCPD/COD                    | 1000:1000                                   | <b>OEt</b>     | 100                                                | 100                              | 100                            | 89                         | 11                          | 2 700          | 3 400                                    | 17 500 | 1.7           | 20 100  | 1.5                          |                        |

\* Duplicated results of Table 1; NB, COE and CDT were distilled over CaH<sub>2</sub> prior to use; NB<sup>COOMe</sup> and ENB were used as received; 1 equiv. of **G2** used in each reaction <sup>a</sup> Monomer and CTA conversion as determined by NMR analysis (refer to the Experimental Section). Full conversion of CTA was observed for all reactions <sup>b</sup> **DF** = difunctionalized copolymer; **CNF** = cyclic non-functionalized copolymer determined after weighting the CNF recovered following elution of the crude sample through a silica column (refer to the Experimental Section) (Scheme 1). <sup>c</sup> Theoretical molar mass value calculated from  $M_{n,theo} = M_{monomer} \times (Conv.monomer \times [monomer]_0) / (Conv.CTA \times [CTA]_0)$ , on the basis of the formation of only functionalized copolymers without taking into account any **CNF**. <sup>d</sup> Experimental molar mass value determined by <sup>1</sup>H NMR analysis (refer to the Experimental Section). <sup>e</sup> Number-average molar mass ( $M_{n,SEC}$ ) and

---

dispersity ( $D_M = M_w/M_n$ ) values determined by SEC vs. polystyrene standards (uncorrected  $M_n$  values) in THF at 30 °C. <sup>f</sup> ½ equiv. of catalyst was added at the beginning of the reaction, the other ½ equiv. was added after 24 h.

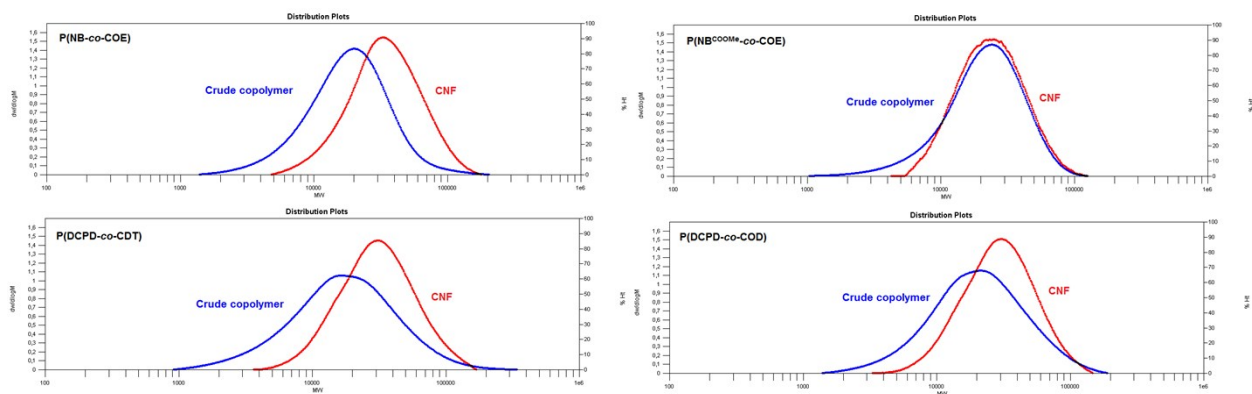

**Fig. S1.** SEC traces of copolyolefin samples prepared from the ROMP of NB/COE, NB<sup>COOMe</sup>/COE, DCPD/CDT and DCPD/COD using **G2** catalyst and CTA **1** (Table 1, entries 1, 6, 12, 14).

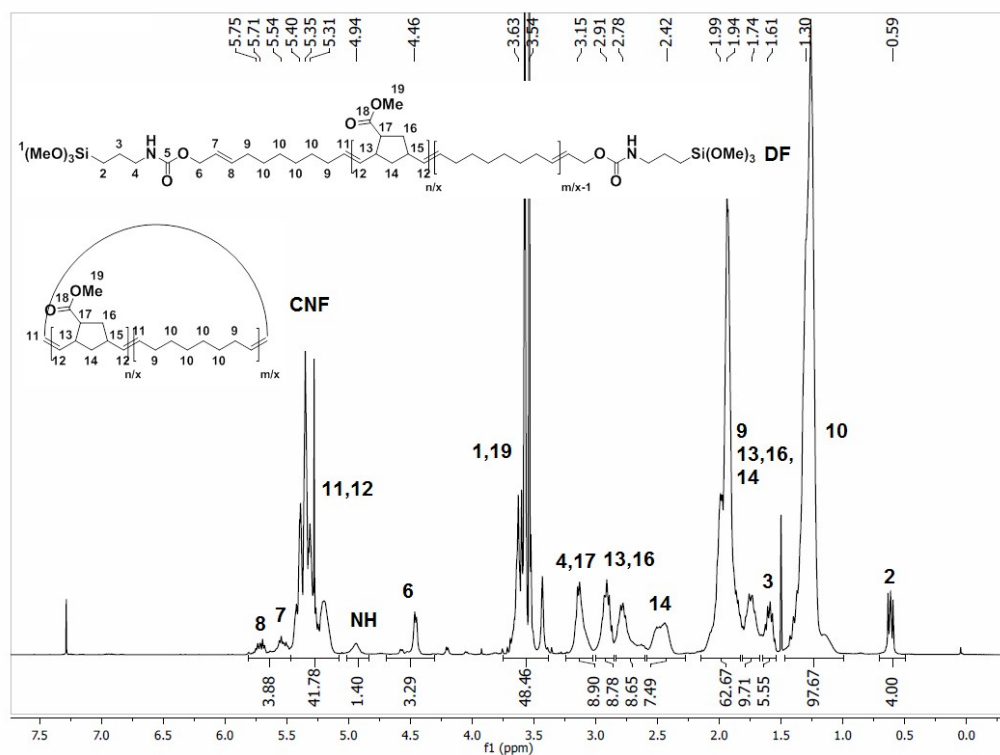

**Fig. S2.** <sup>1</sup>H NMR spectrum (400 MHz, CDCl<sub>3</sub>, 23 °C) of a crude copolymer prepared from ROMP/CM of NB<sup>COOMe</sup> and COE using **G2** and CTA **1** (Table 1, entry 6).

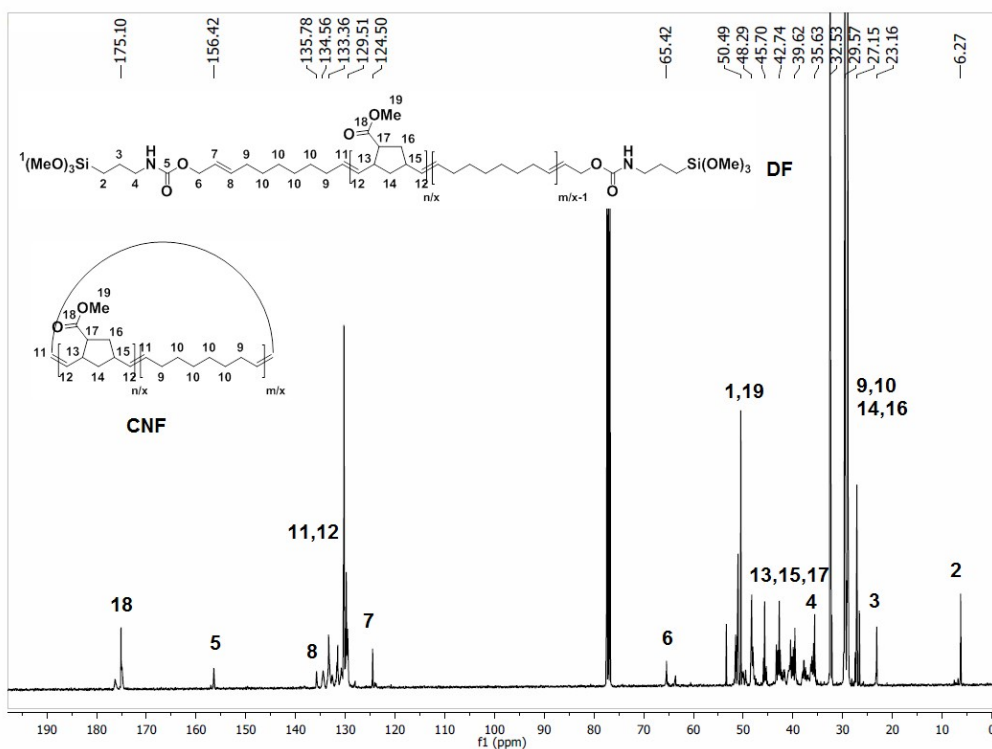

**Fig. S3.**  $^{13}\text{C}$  NMR spectrum (100 MHz,  $\text{CDCl}_3$ , 23  $^\circ\text{C}$ ) of a crude copolymer prepared from ROMP/CM of  $\text{NB}^{\text{COOMe}}$  and COE using **G2** and CTA **1** (Table 1, entry 6).

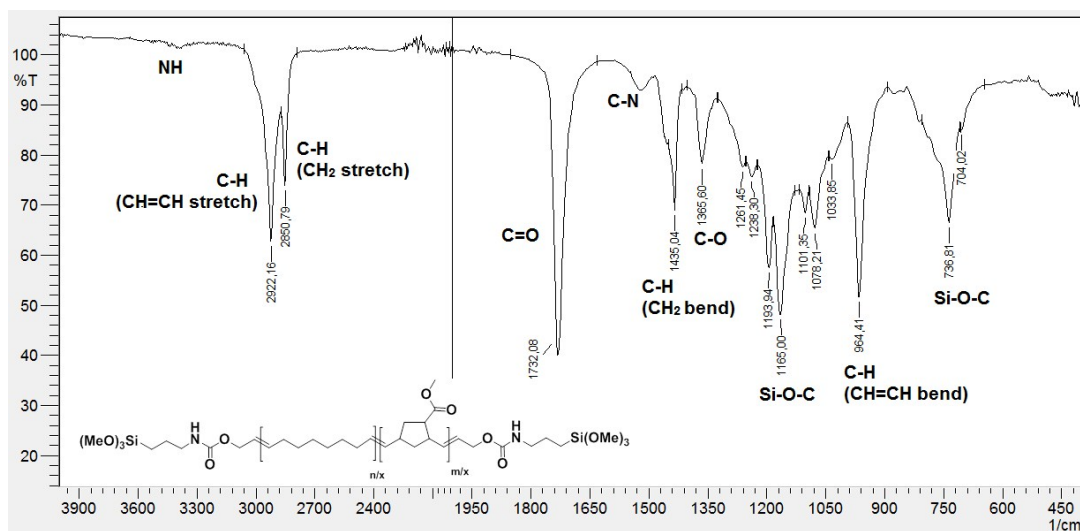

**Fig. S4.** FTIR spectrum of a crude copolymer prepared from ROMP/CM of  $\text{NB}^{\text{COOMe}}$  and COE using **G2** and CTA **1** (Table 1, entry 6).

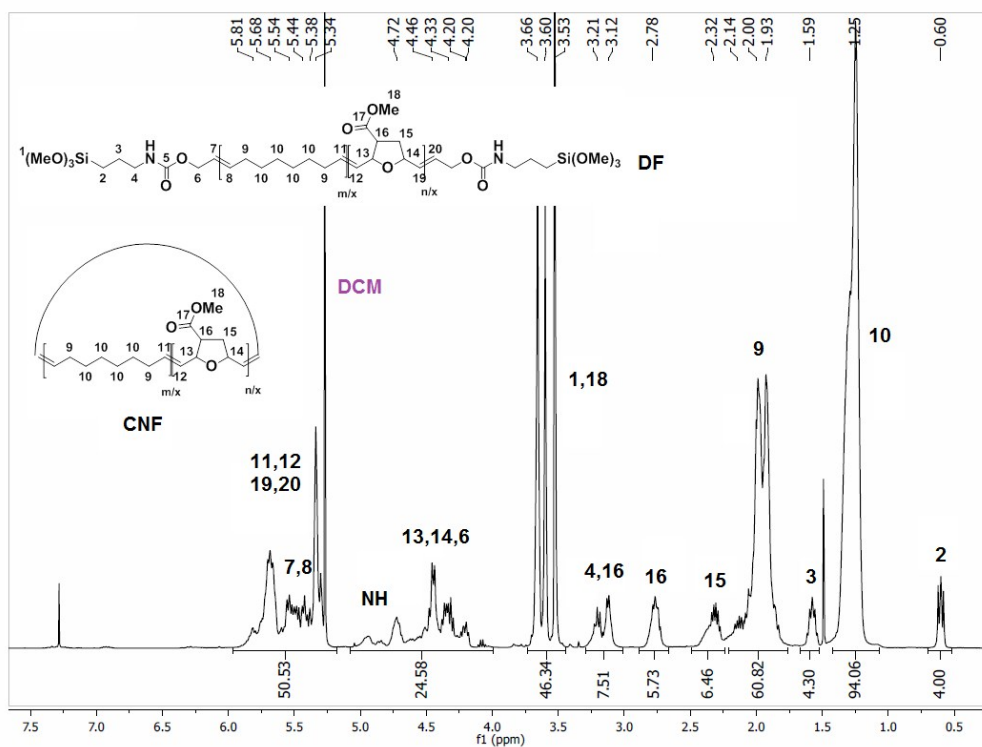

**Fig. S5.**  $^1\text{H}$  NMR spectrum (500 MHz,  $\text{CDCl}_3$ , 23  $^\circ\text{C}$ ) of a crude copolymer prepared from ROMP/CM of  $\text{oxaNB}^{\text{COOMe}}$  and COE using **G2** and CTA **1** (Table 1, entry 8).

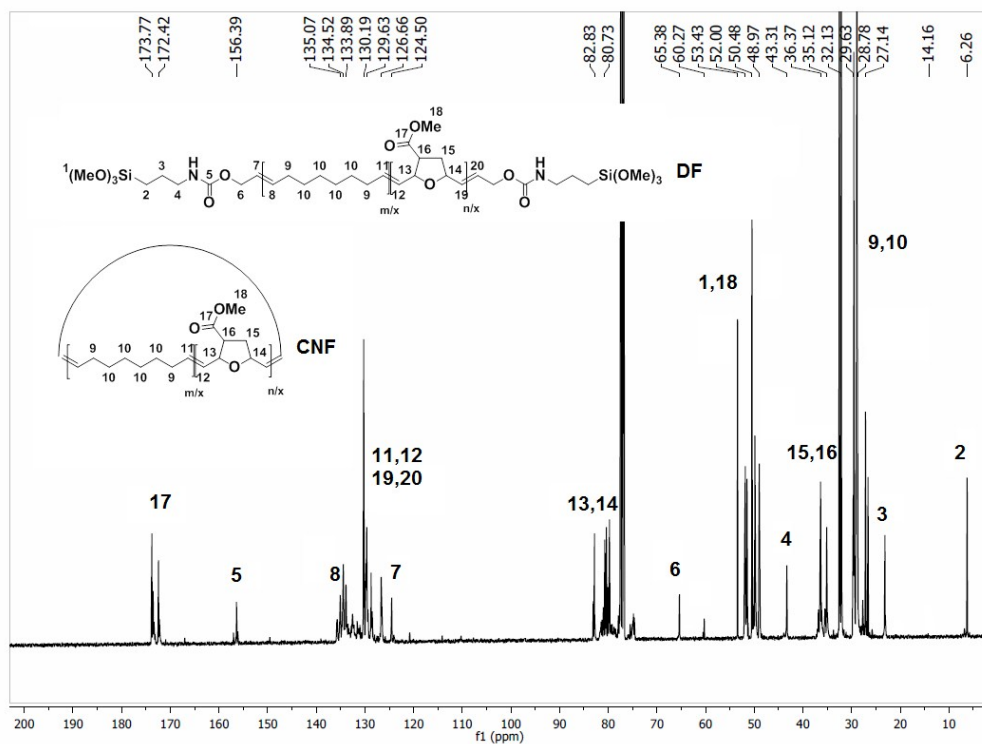

**Fig. S6.**  $^{13}\text{C}\{^1\text{H}\}$  NMR spectrum (125 MHz,  $\text{CDCl}_3$ , 23  $^\circ\text{C}$ ) of a crude copolymer prepared from ROMP/CM of  $\text{oxaNB}^{\text{COOMe}}$  and COE using **G2** and CTA **1** (Table 1, entry 8).

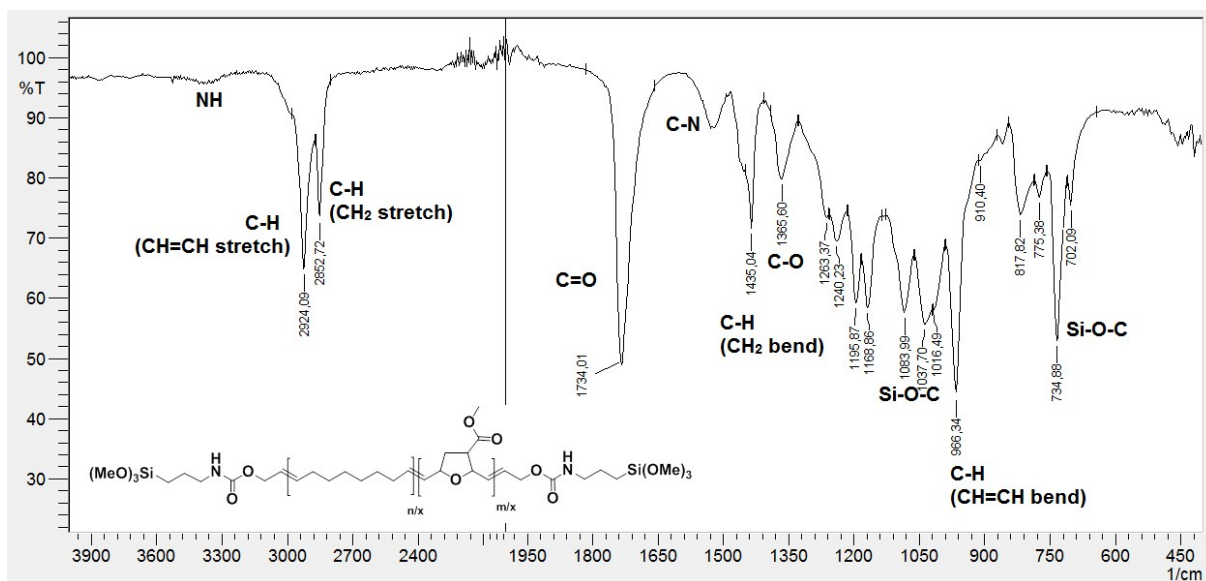

**Fig. S7.** FTIR spectrum of a crude copolymer prepared from ROMP/CM of oxanB<sup>COOMe</sup> and COE using **G2** and CTA **1** (Table 1, entry 8).

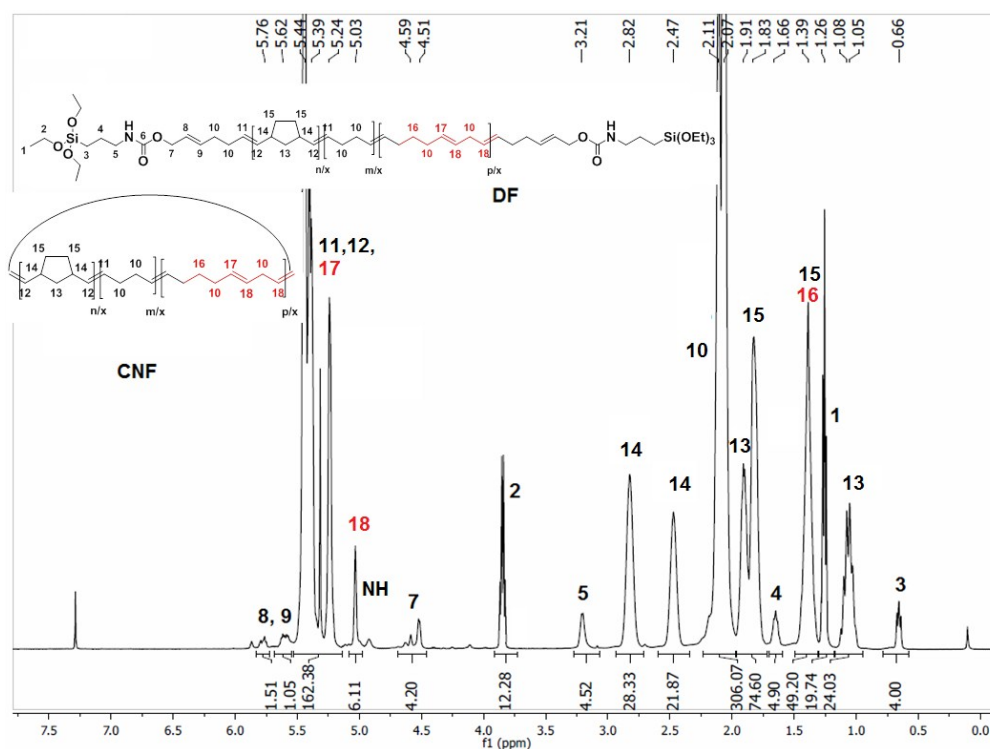

**Fig. S8.** <sup>1</sup>H NMR spectrum (500 MHz, CDCl<sub>3</sub>, 23 °C) of a crude copolymer prepared from ROMP/CM of NB and CDT using **G2** and CTA **1** (Table 1, entry 3).

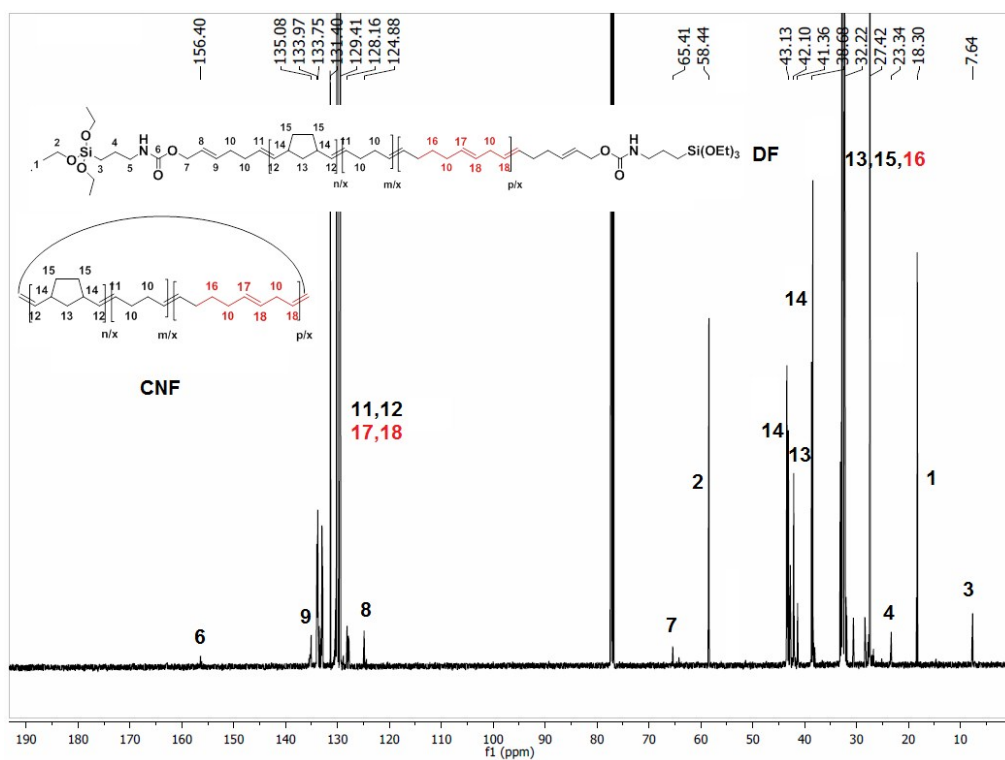

**Fig. S9.**  $^{13}\text{C}\{^1\text{H}\}$  NMR spectrum (125 MHz,  $\text{CDCl}_3$ , 23 °C) of a crude copolymer prepared from ROMP/CM of NB and CDT using **G2** and CTA **1** (Table 1, entry 3).

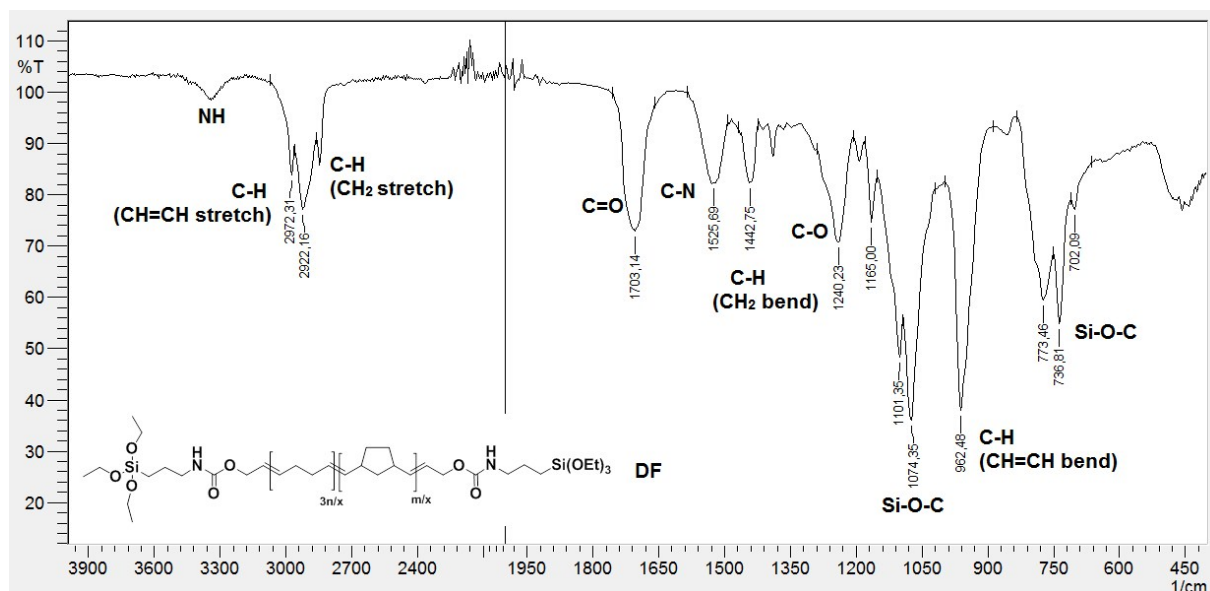

**Fig. S10.** FTIR spectrum of a crude copolymer prepared from ROMP/CM of NB and CDT using **G2** and CTA **1** (Table 1, entry 3).

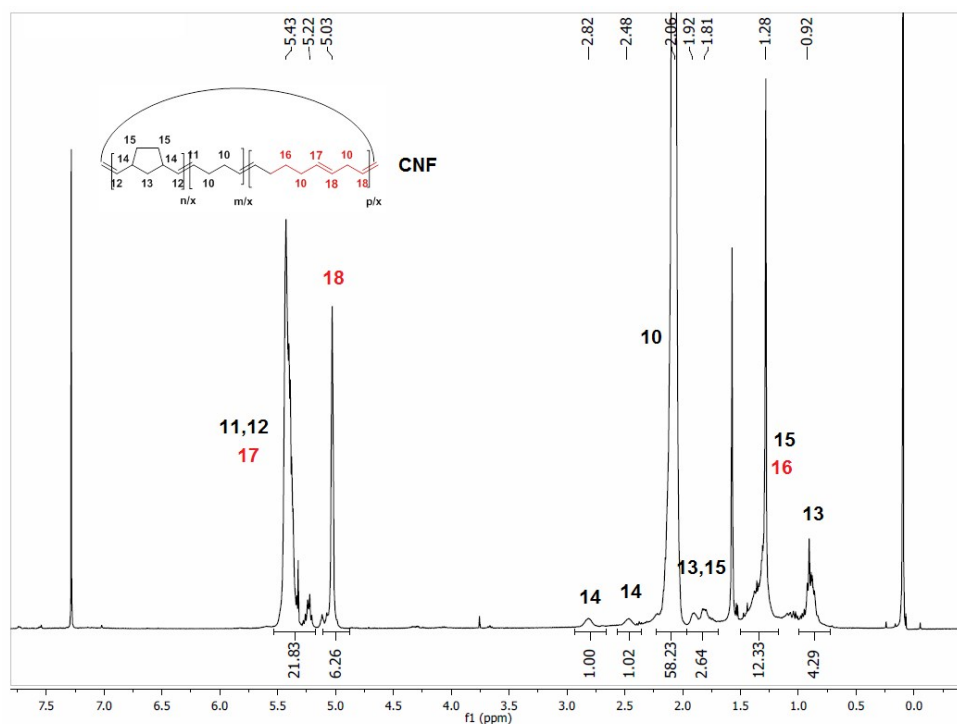

**Fig.S11.**  $^1\text{H}$  NMR spectrum (400 MHz,  $\text{CDCl}_3$ , 23  $^\circ\text{C}$ ) of CNF copolymer isolated from a crude copolymer prepared from ROMP/CM of NB and CDT using **G2** and CTA **1** (Table 1, entry 3).

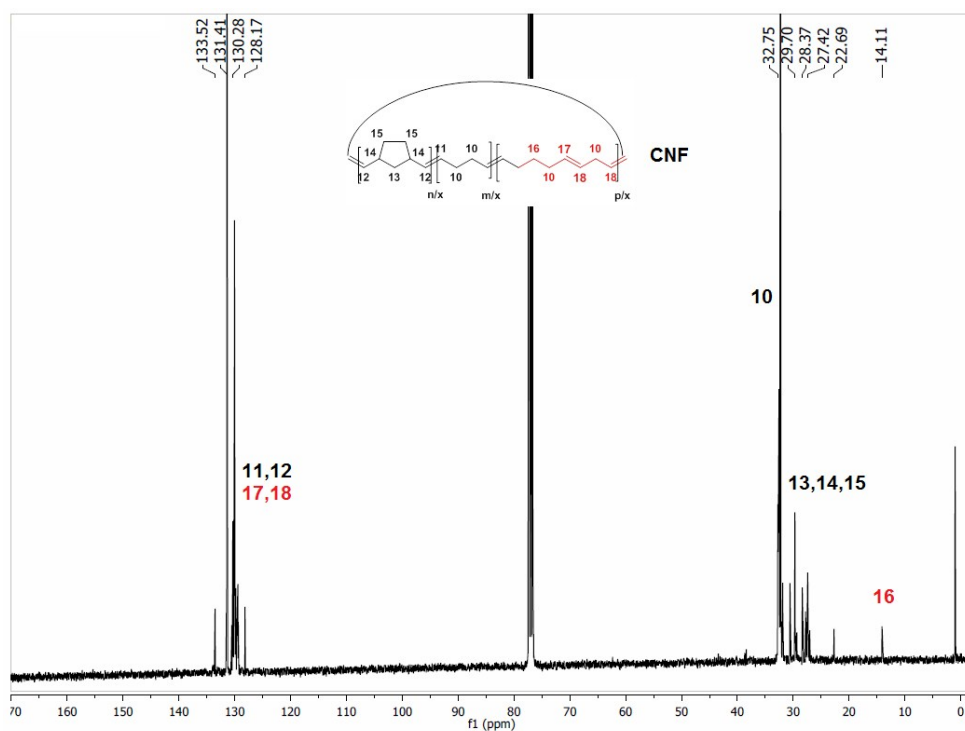



**Fig. S12.**  $^{13}\text{C}\{^1\text{H}\}$  NMR spectrum (100 MHz,  $\text{CDCl}_3$ , 23 °C) of CNF copolymer isolated from a crude copolymer prepared from ROMP/CM of NB and CDT using **G2** and CTA **1** (Table 1, entry 3).

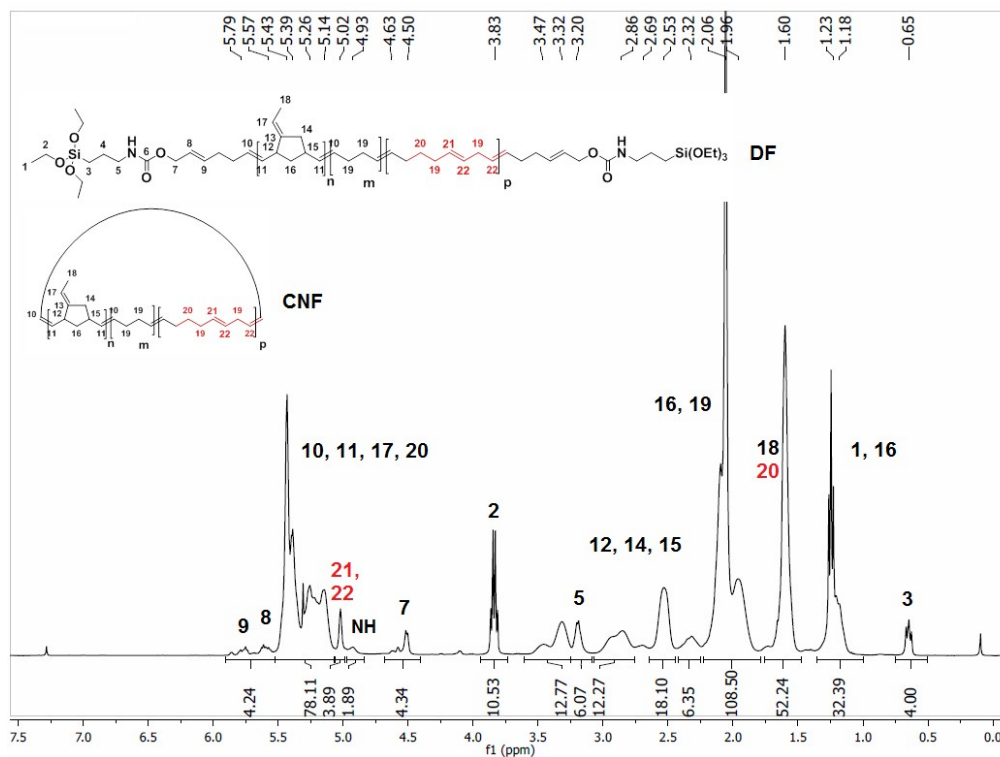

**Fig.S13.**  $^1\text{H}$  NMR spectrum (400 MHz,  $\text{CDCl}_3$ , 23 °C) of a crude copolymer prepared from ROMP/CM of ENB and CDT using **G2** and CTA **1** (Table 1, entry 4).

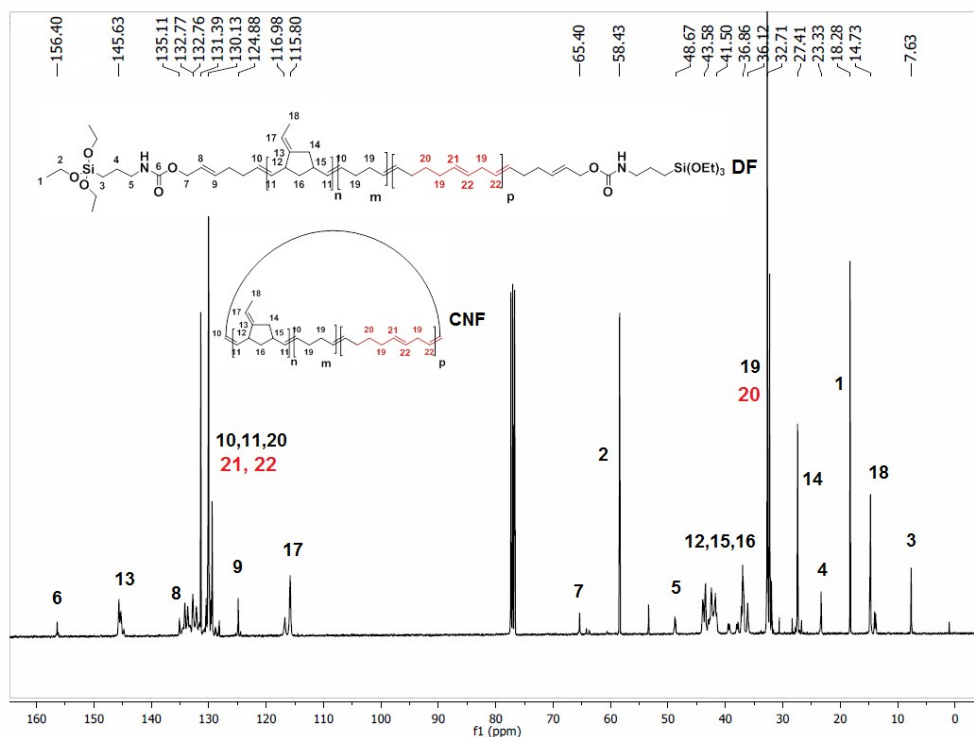

**Fig. S14.**  $^{13}\text{C}\{^1\text{H}\}$  NMR spectrum (100 MHz,  $\text{CDCl}_3$ , 23 °C) of a crude copolymer prepared from ROMP/CM of ENB and CDT using **G2** and CTA **1** (Table 1, entry 4).

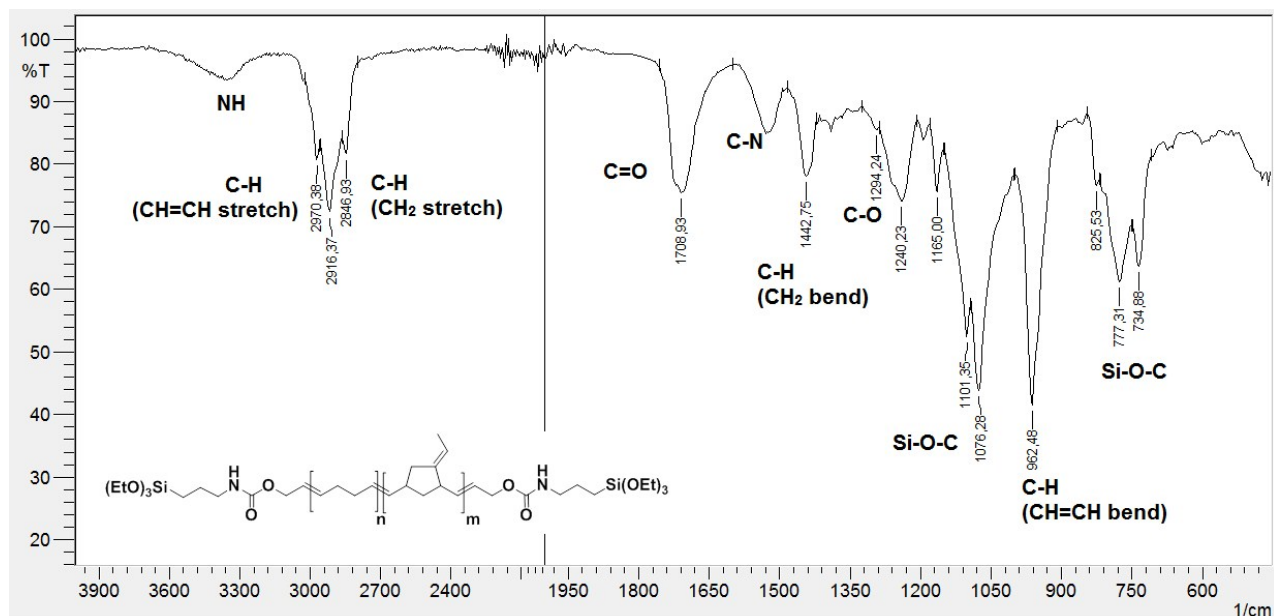

**Fig.S15.** FTIR spectrum of a crude copolymer prepared from ROMP/CM of ENB and CDT using **G2** and CTA **1** (Table 1, entry 4).

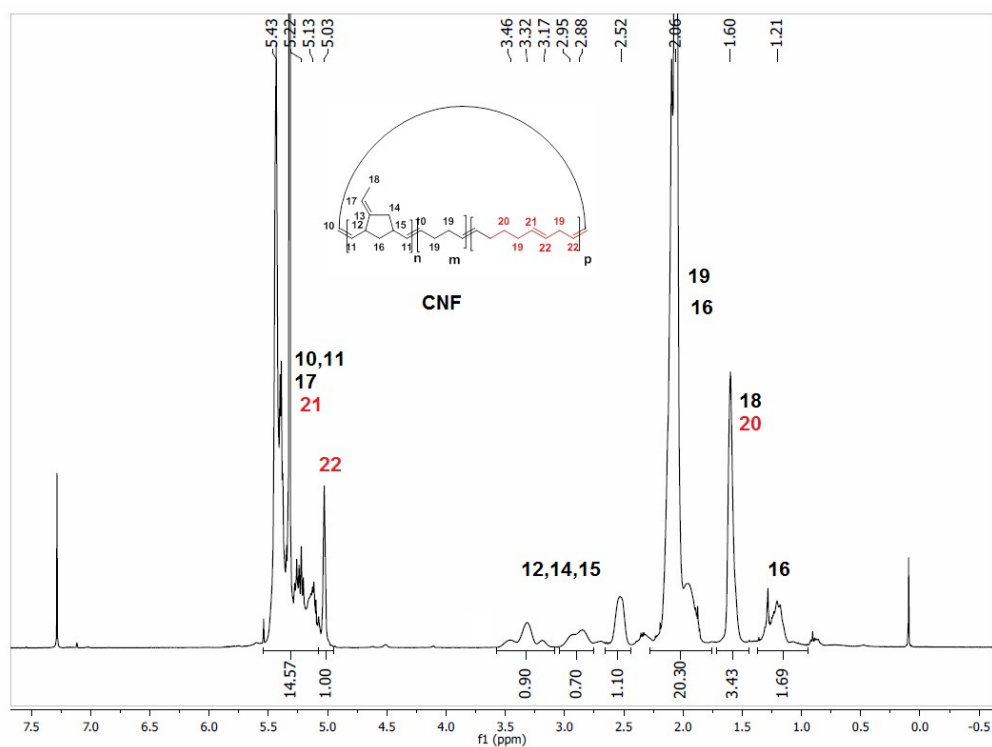

**Fig. S16.**  $^1\text{H}$  NMR spectrum (400 MHz,  $\text{CDCl}_3$ , 23  $^\circ\text{C}$ ) of CNF copolymer isolated from a crude copolymer prepared from ROMP/CM of ENB and CDT using G2 and CTA 1 (Table 1, entry 4).

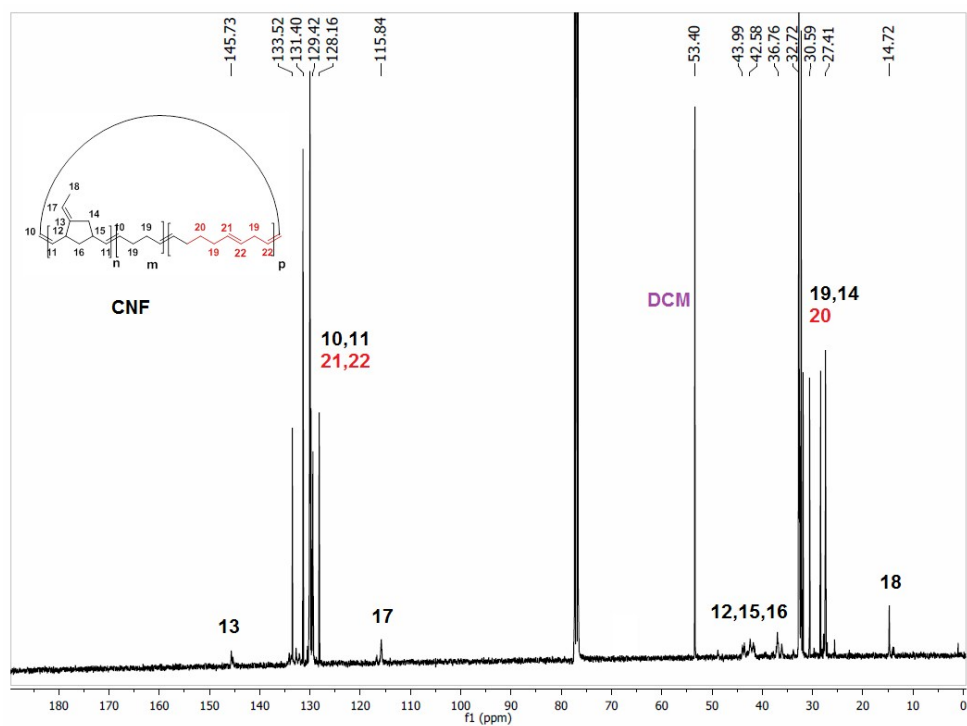

**Fig. S17.**  $^{13}\text{C}\{^1\text{H}\}$  NMR spectrum (125 MHz,  $\text{CDCl}_3$ , 23 °C) of CNF copolymer isolated from a crude copolymer prepared from ROMP/CM of ENB and CDT using **G2** and CTA **1** (Table 1, entry 4).

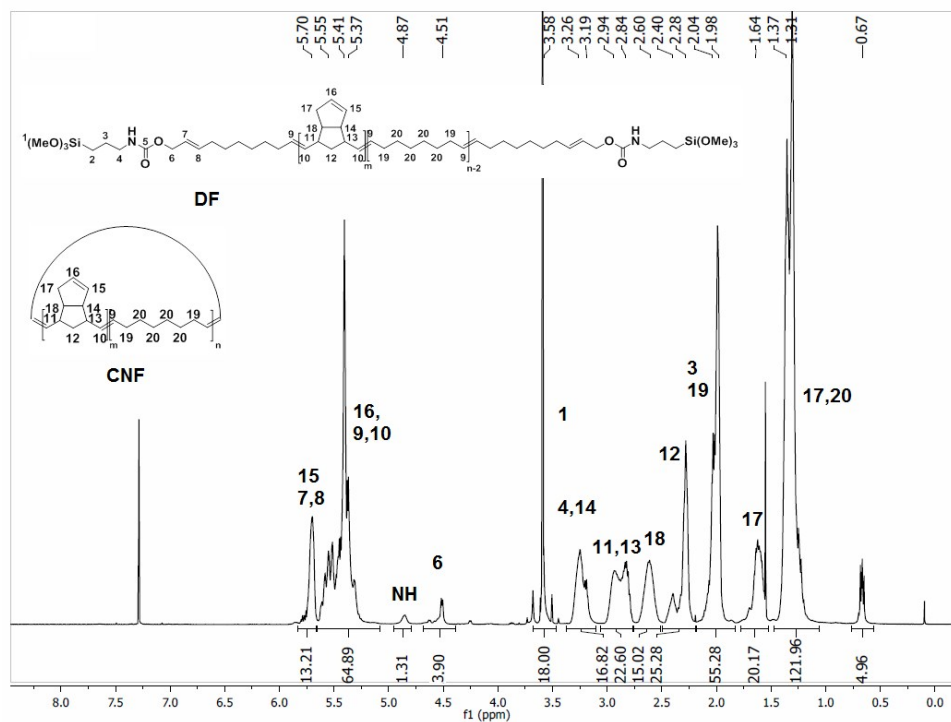

**Fig.S18.**  $^1\text{H}$  NMR spectrum (500 MHz,  $\text{CDCl}_3$ , 23 °C) of a crude copolymer prepared from ROMP/CM of DCPD and COE using **G2** and CTA **1** (Table 1, entry 10).

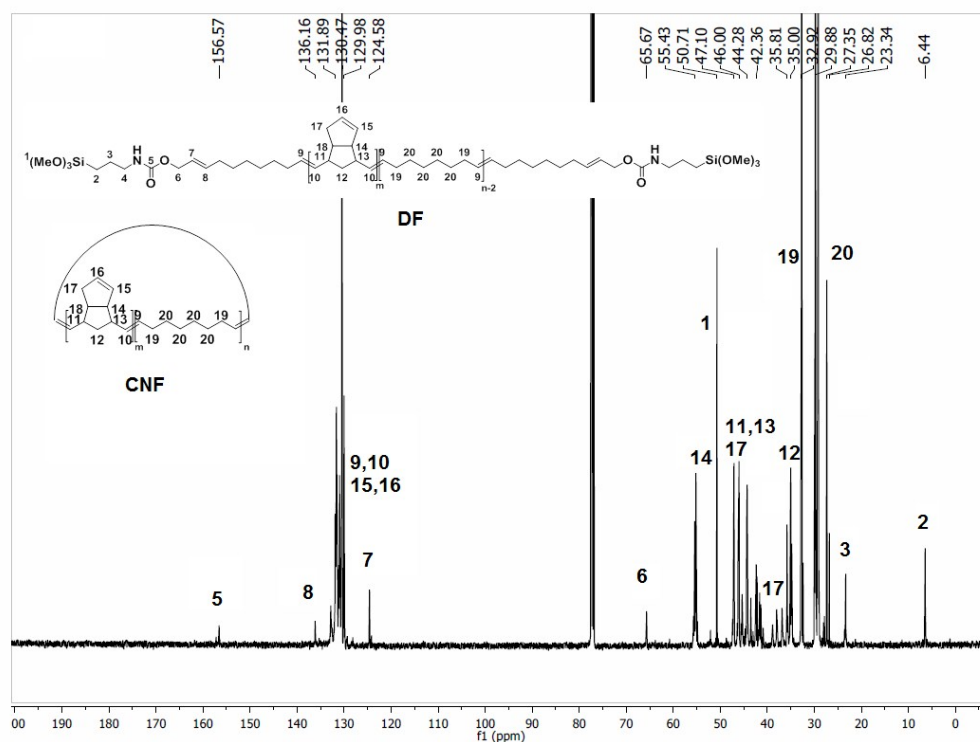

**Fig.S19.**  $^{13}\text{C}\{^1\text{H}\}$  NMR spectrum (125 MHz,  $\text{CDCl}_3$ , 23 °C) of a crude copolymer prepared from ROMP/CM of DCPD and COE using **G2** and **CTA 1** (Table 1, entry 10).

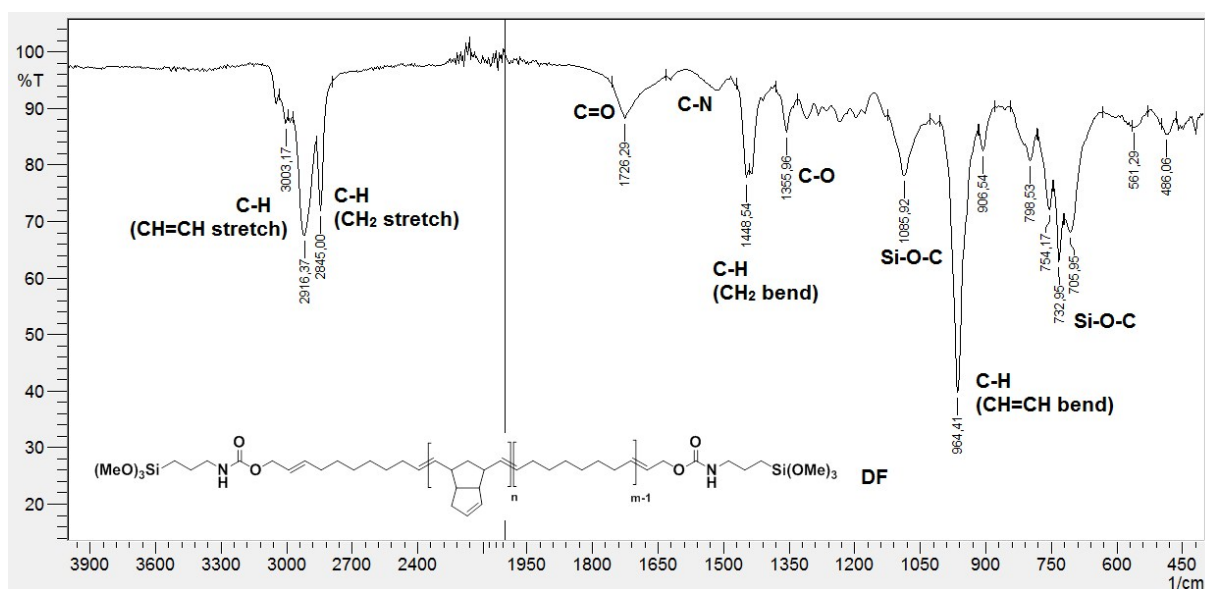

**Fig. S20.** FTIR spectrum of a crude copolymer prepared from ROMP/CM of DCPD and COE using **G2** and **CTA 1** (Table 1, entry 10).

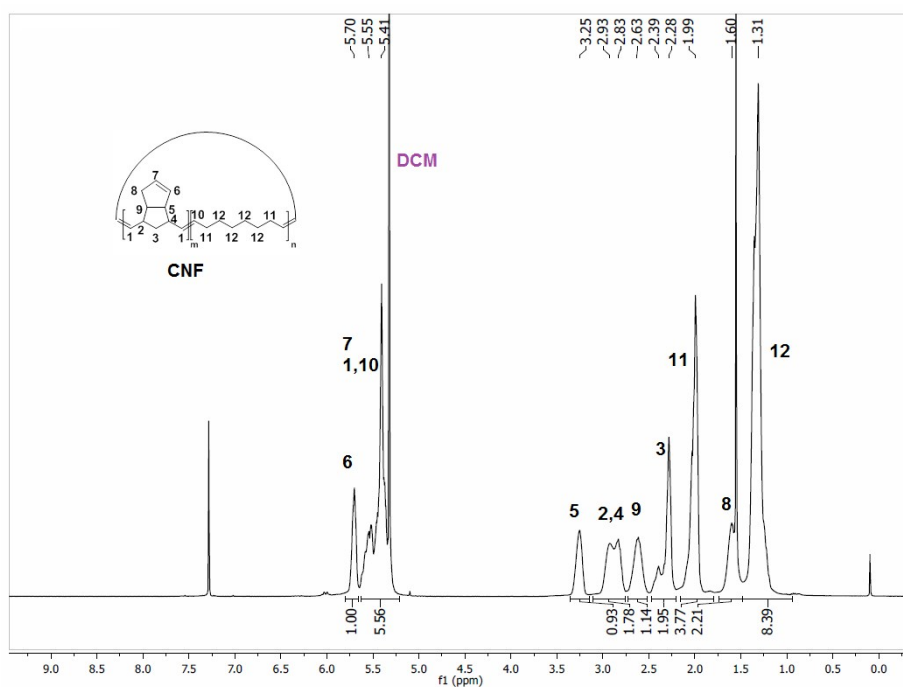

**Fig. S21.**  $^1\text{H}$  NMR spectrum (500 MHz,  $\text{CDCl}_3$ , 23 °C) of CNF copolymer isolated from a crude copolymer prepared from ROMP/CM of DCPD and COE using **G2** and CTA **1** (Table 1, entry 10).

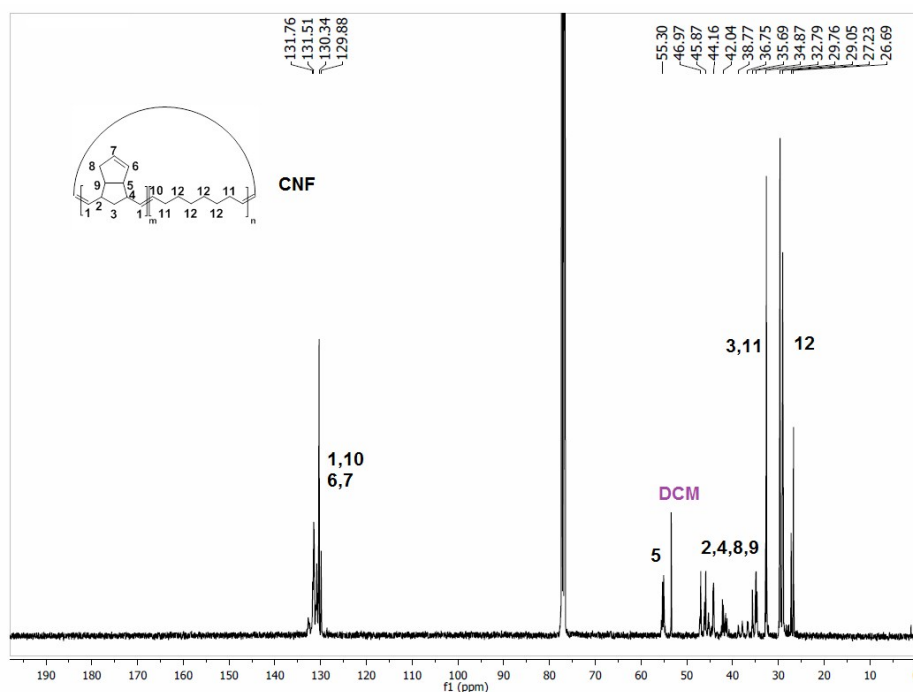

**Fig.S22.**  $^{13}\text{C}\{^1\text{H}\}$  NMR spectrum (125 MHz,  $\text{CDCl}_3$ , 23 °C) of CNF copolymer isolated from a crude copolymer prepared from ROMP/CM of DCPD and COE using **G2** and CTA **1** (Table 1, entry 10).

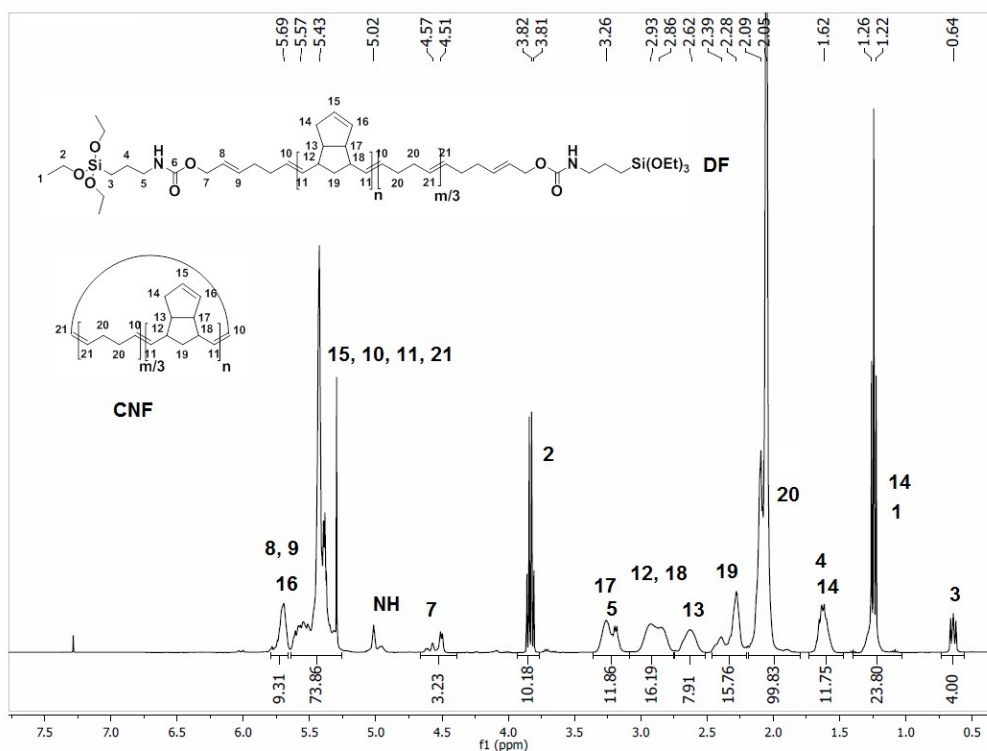

**Fig. S23.**  $^1\text{H}$  NMR spectrum (500 MHz,  $\text{CDCl}_3$ , 23  $^\circ\text{C}$ ) of a crude copolymer prepared from ROMP/CM of DCPD and CDT using **G2** and CTA **1** (Table 1, entry 12).

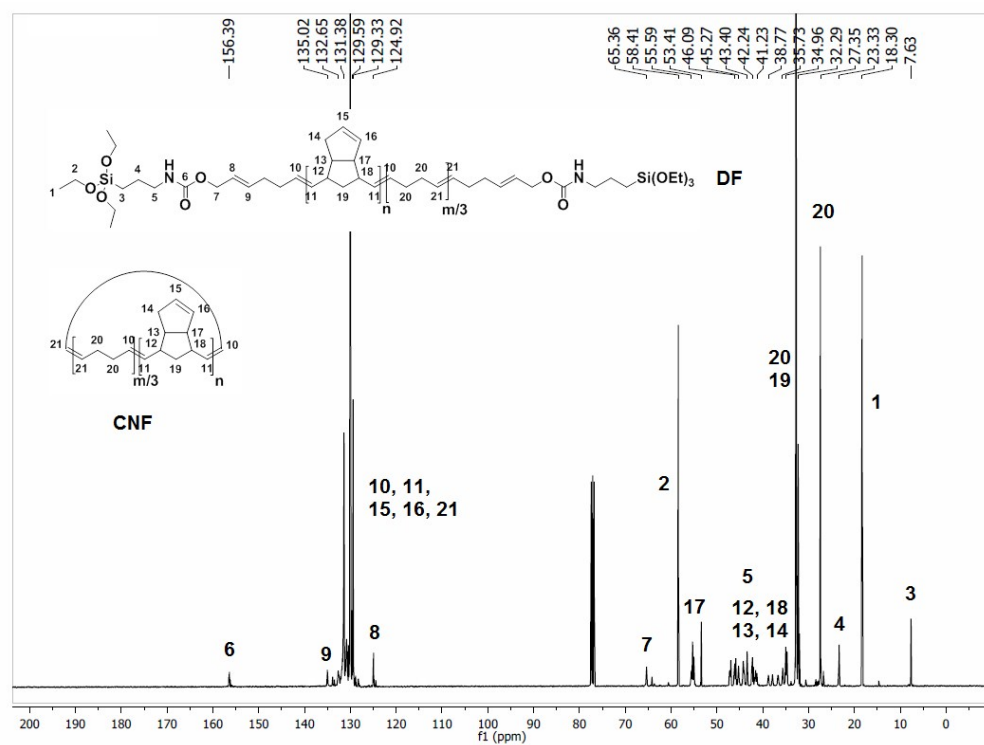

**Fig. S24.**  $^{13}\text{C}\{^1\text{H}\}$  NMR spectrum (125 MHz,  $\text{CDCl}_3$ , 23  $^\circ\text{C}$ ) of a crude copolymer prepared from ROMP/CM of DCPD and CDT using **G2** and CTA **1** (Table 1, entry 12).

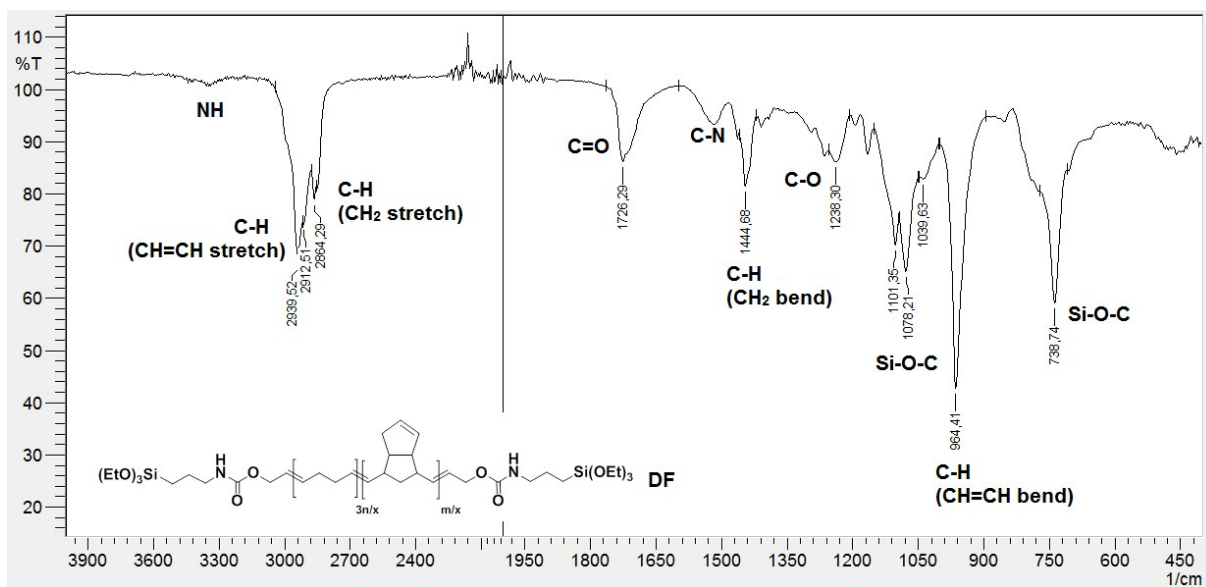

**Fig. S25.** FTIR spectrum of a crude copolymer prepared from ROMP/CM of DCPD and CDT using **G2** and CTA **1** (Table 1, entry 12).

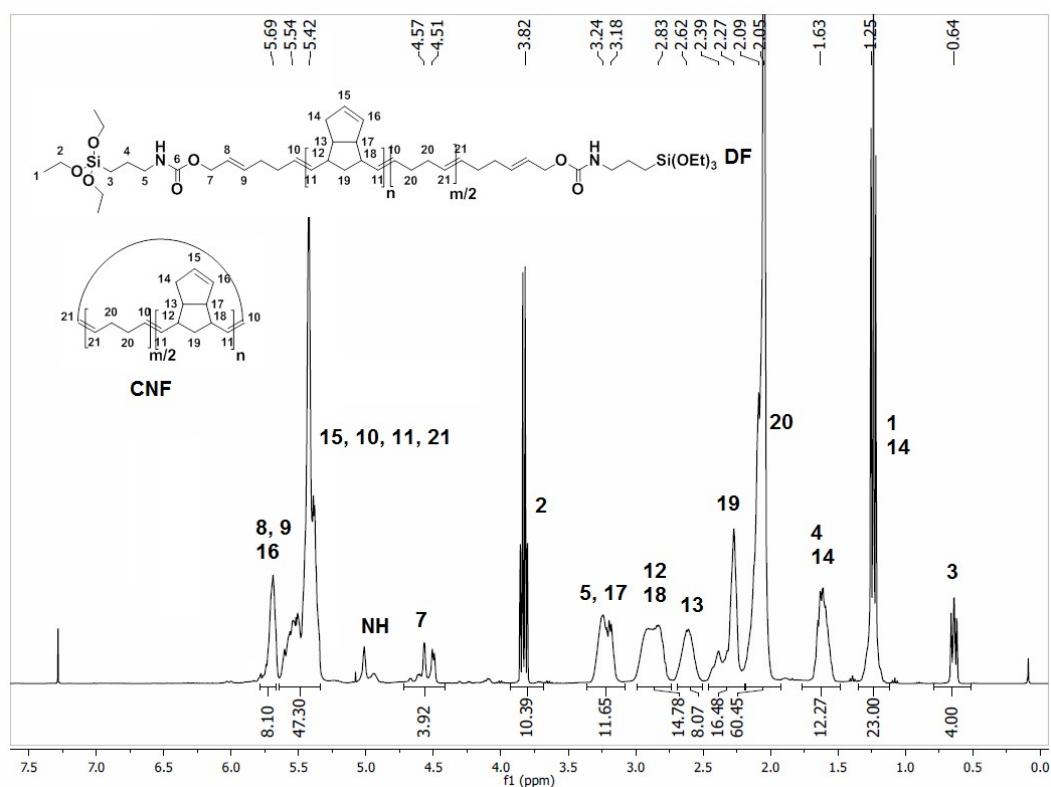

**Fig. S26.** <sup>1</sup>H NMR spectrum (500 MHz, CDCl<sub>3</sub>, 23 °C) of a crude copolymer prepared from ROMP/CM of DCPD and COD using **G2** and CTA **1** (Table 1, entry 14).



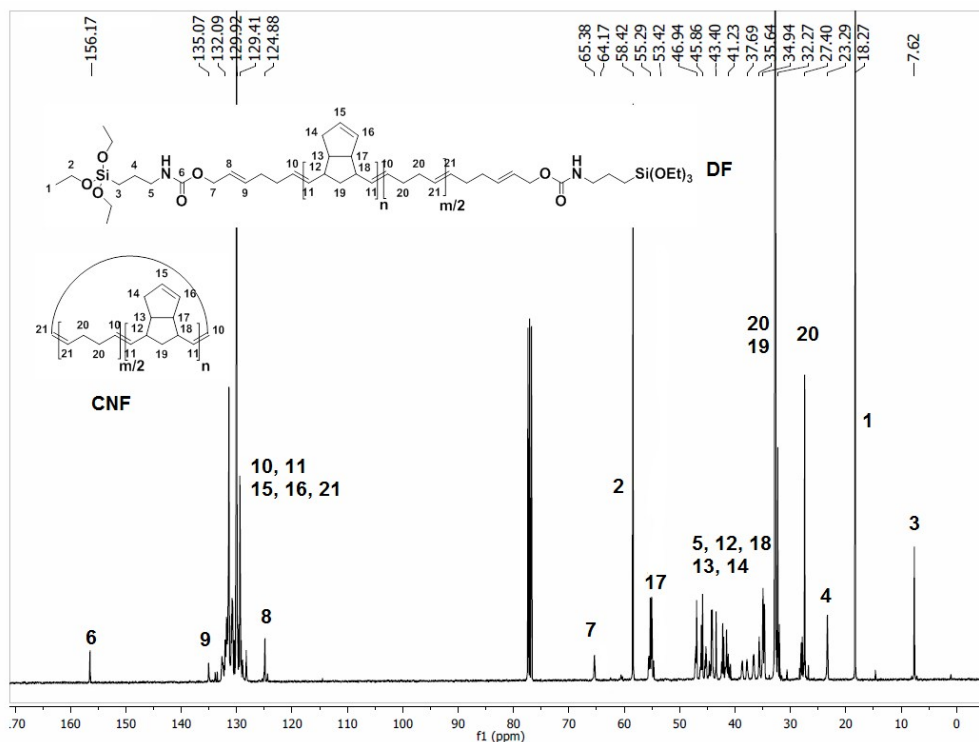

**Fig. S27.**  $^{13}\text{C}\{^1\text{H}\}$  NMR spectrum (125 MHz,  $\text{CDCl}_3$ , 23 °C) of a crude copolymer prepared from ROMP/CM of DCPD and COD using **G2** and **CTA 1** (Table 1, entry 14).

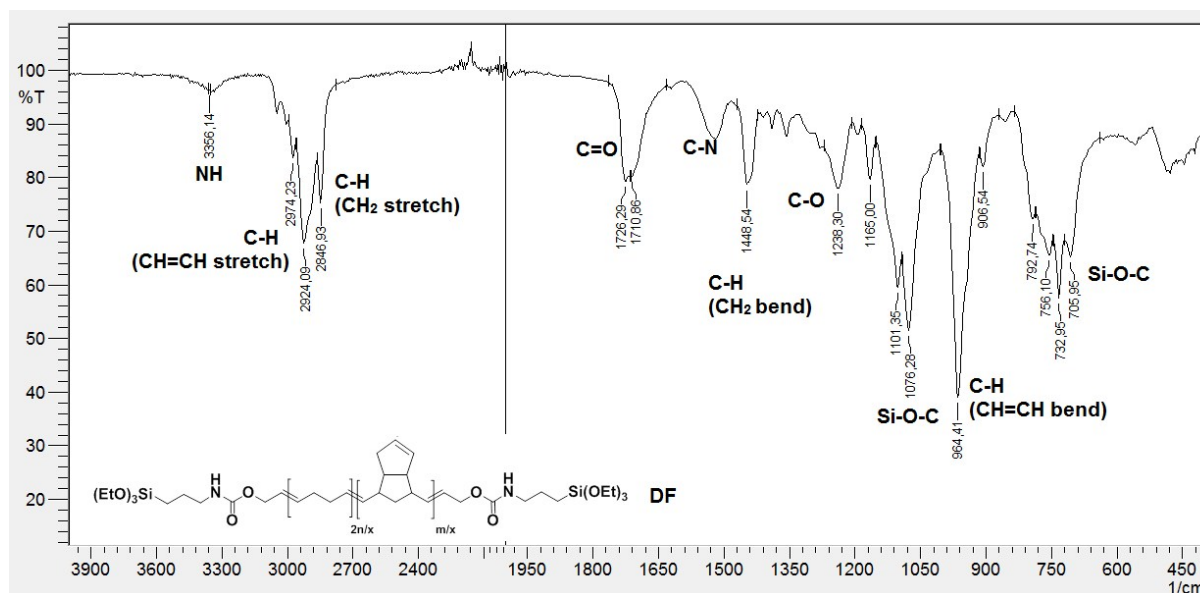

**Fig. S28.** FTIR spectrum of a crude copolymer prepared from ROMP/CM of DCPD and COD using **G2** and **CTA 1** (Table 1, entry 14).

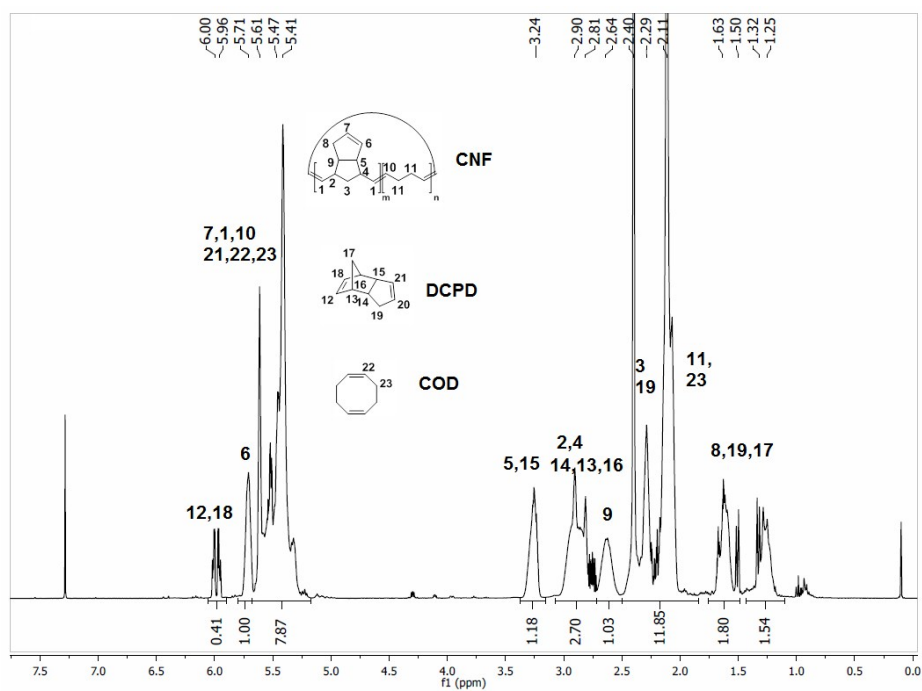

**Fig. S29.**  $^1\text{H}$  NMR spectrum (500 MHz,  $\text{CDCl}_3$ , 23  $^\circ\text{C}$ ) of CNF copolymer isolated from a crude copolymer prepared from ROMP/CM of DCPD and COD using **G2** and CTA **1** (Table 1, entry 14).

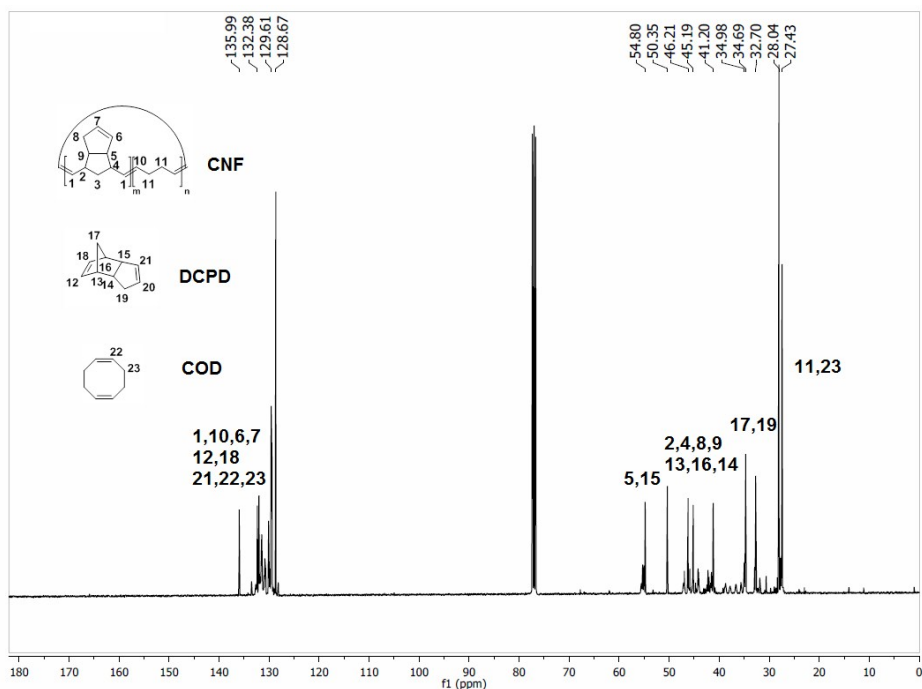

**Fig. S30.**  $^{13}\text{C}\{^1\text{H}\}$  NMR spectrum (125 MHz,  $\text{CDCl}_3$ , 23  $^\circ\text{C}$ ) of CNF copolymer isolated from a crude copolymer prepared from ROMP/CM of DCPD and COD using **G2** and CTA **1** (Table 1, entry 14).

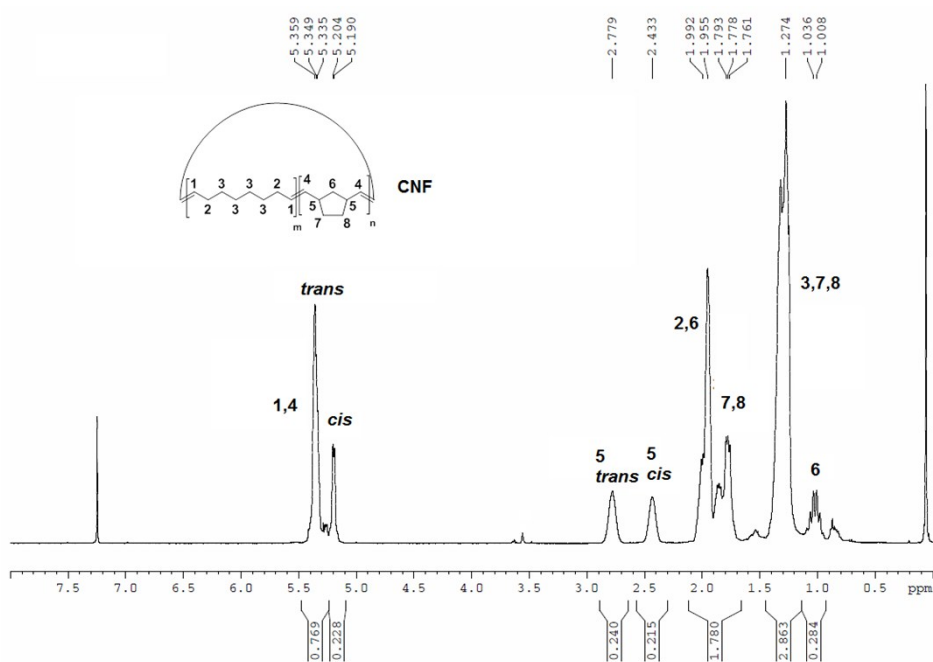

**Fig. S31.**  $^1\text{H}$  NMR spectrum (400 MHz,  $\text{CDCl}_3$ , 23  $^\circ\text{C}$ ) of CNF copolymer isolated from a crude copolymer prepared from ROMP/CM of NB and COE using **G2** and CTA **1-OEt** (Table 1, entry 1).

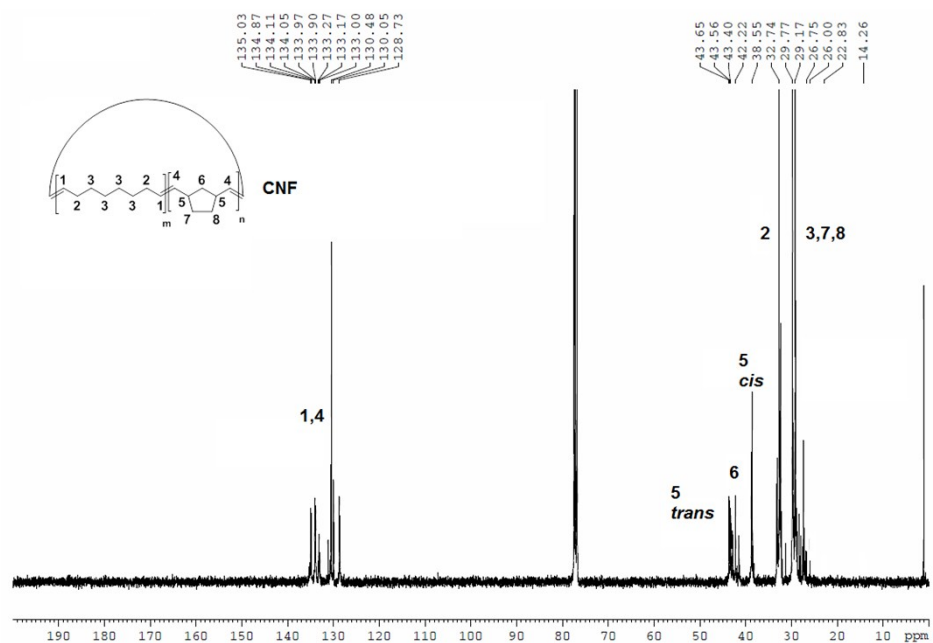

**Fig. S32.**  $^{13}\text{C}$  NMR spectrum (100 MHz,  $\text{CDCl}_3$ , 23  $^\circ\text{C}$ ) of CNF copolymer isolated from a crude copolymer prepared from ROMP/CM of NB and COE using **G2** and CTA **1-OEt** (Table 1, entry 1).

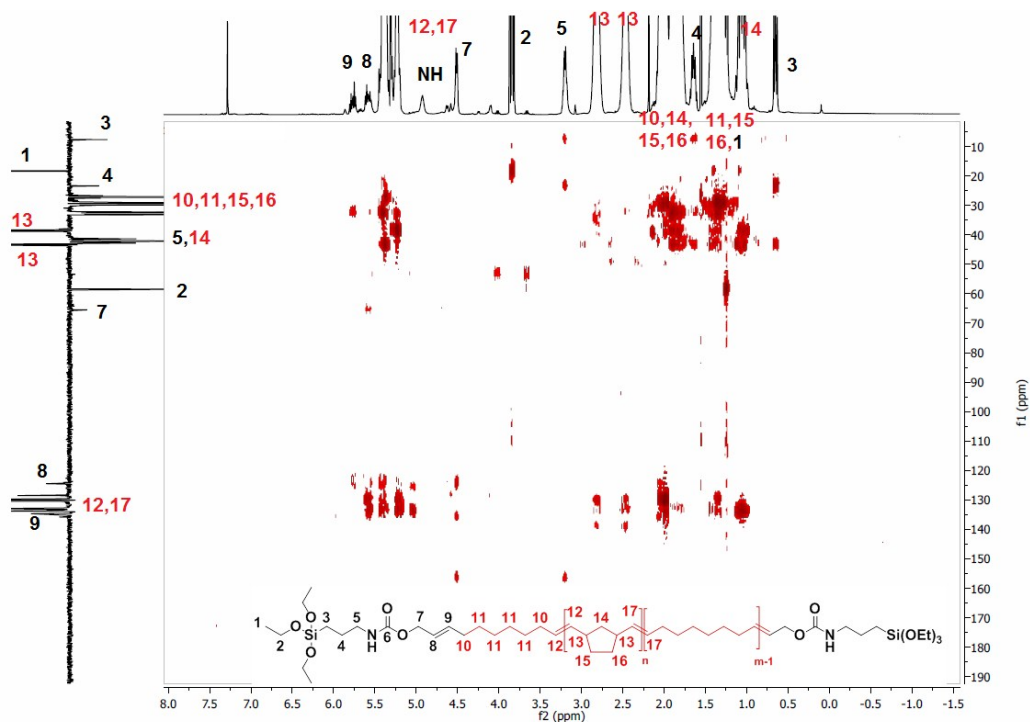

**Fig. S33.**  $^1\text{H}$ - $^{13}\text{C}\{^1\text{H}\}$  HMBC (DEPT) NMR spectrum (400 MHz,  $\text{CDCl}_3$ , 23  $^\circ\text{C}$ ) of a crude copolymer prepared from ROMP/CM of NB and COE using **G2** and CTA **1** (Table 1, entry 1).

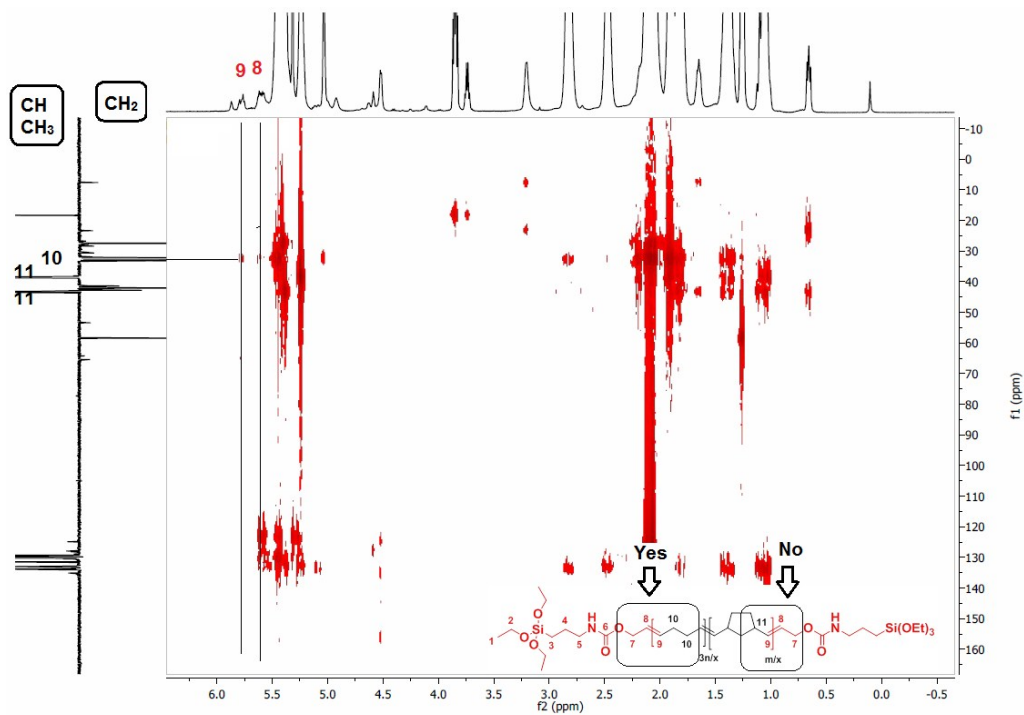

**Fig. S34.**  $^1\text{H}$ - $^{13}\text{C}$  HMBC (DEPT) NMR spectrum (400 MHz,  $\text{CDCl}_3$ , 23  $^\circ\text{C}$ ) of a crude copolymer prepared from ROMP/CM of NB and CDT using **G2** and CTA **1** (Table 1, entry 3; spectrum with assignments of all signals in Fig. S35).

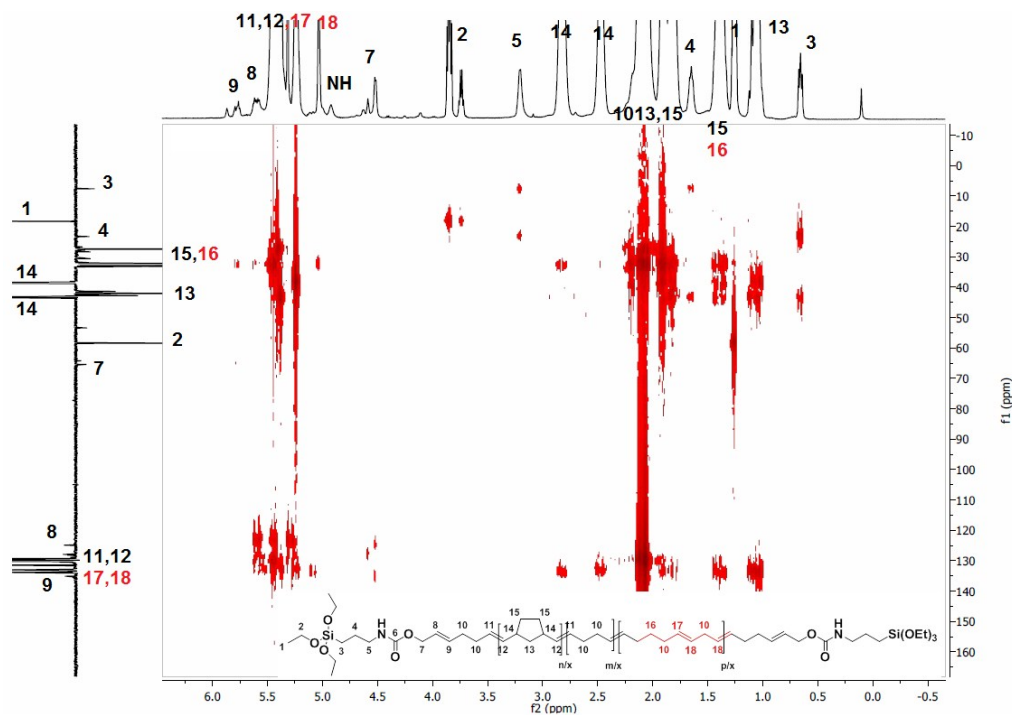

**Fig. S35.**  $^1\text{H}$ - $^{13}\text{C}$  HMBC (DEPT) NMR spectrum (400 MHz,  $\text{CDCl}_3$ , 23  $^\circ\text{C}$ ) of a crude copolymer prepared from ROMP/CM of NB and CDT using **G2** and CTA **1** (Table 1, entry 3).

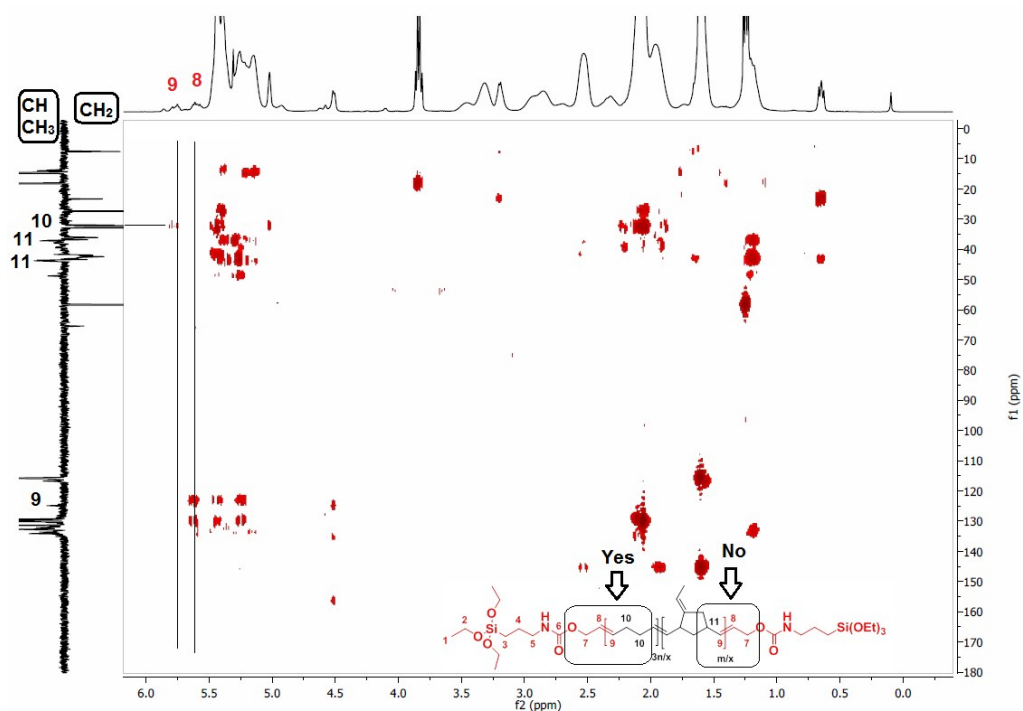

**Fig. S36.**  $^1\text{H}$ - $^{13}\text{C}$  HMBC (DEPT) NMR spectrum (400 MHz,  $\text{CDCl}_3$ , 23  $^\circ\text{C}$ ) of a crude copolymer prepared from ROMP/CM of ENB and CDT using **G2** and **CTA 1** (Table 1, entry 4; spectrum with assignments of all signals in Fig. S37).

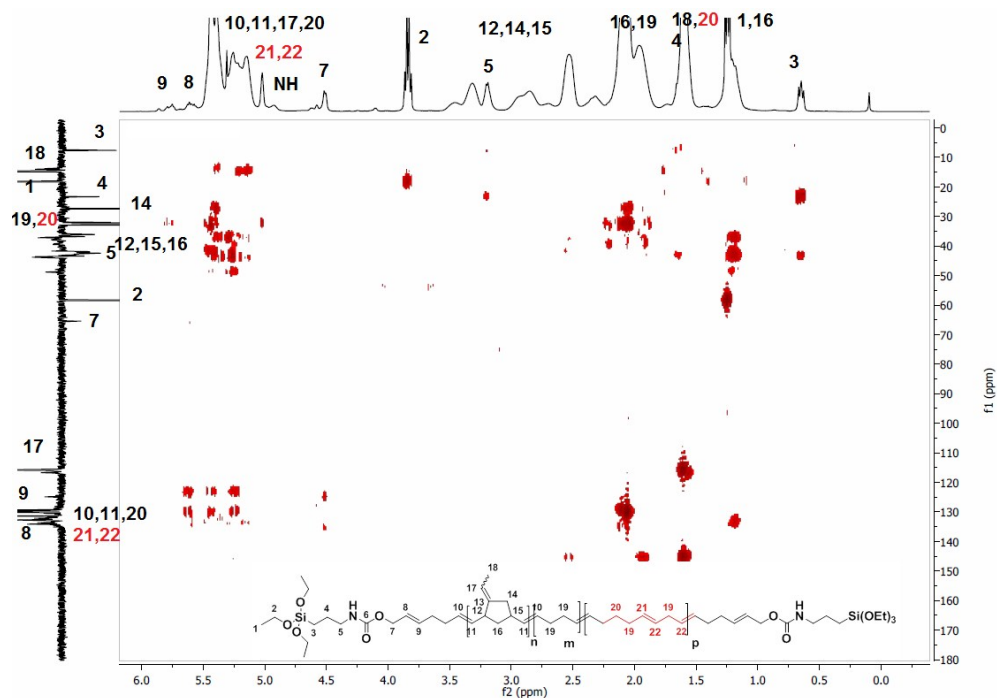

**Fig. S37.**  $^1\text{H}$ - $^{13}\text{C}$  HMBC (DEPT) NMR spectrum (400 MHz,  $\text{CDCl}_3$ , 23  $^\circ\text{C}$ ) of a crude copolymer prepared from ROMP/CM of ENB and CDT using **G2** and CTA **1** (Table 1, entry 4).

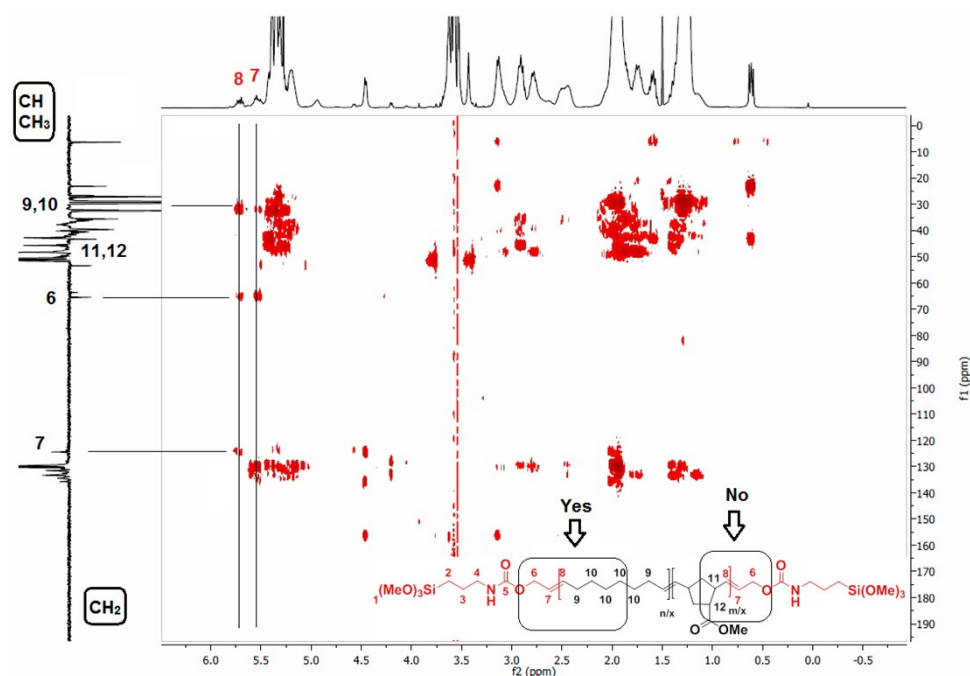

**Fig. S38.**  $^1\text{H}$ - $^{13}\text{C}$  HMBC (DEPT) NMR spectrum (400 MHz,  $\text{CDCl}_3$ , 23  $^\circ\text{C}$ ) of a crude copolymer prepared from ROMP/CM of oxanB<sup>COOMe</sup> and COE using **G2** and CTA **1** (Table 1, entry 8; spectrum with assignments of all signals in Fig.S39).

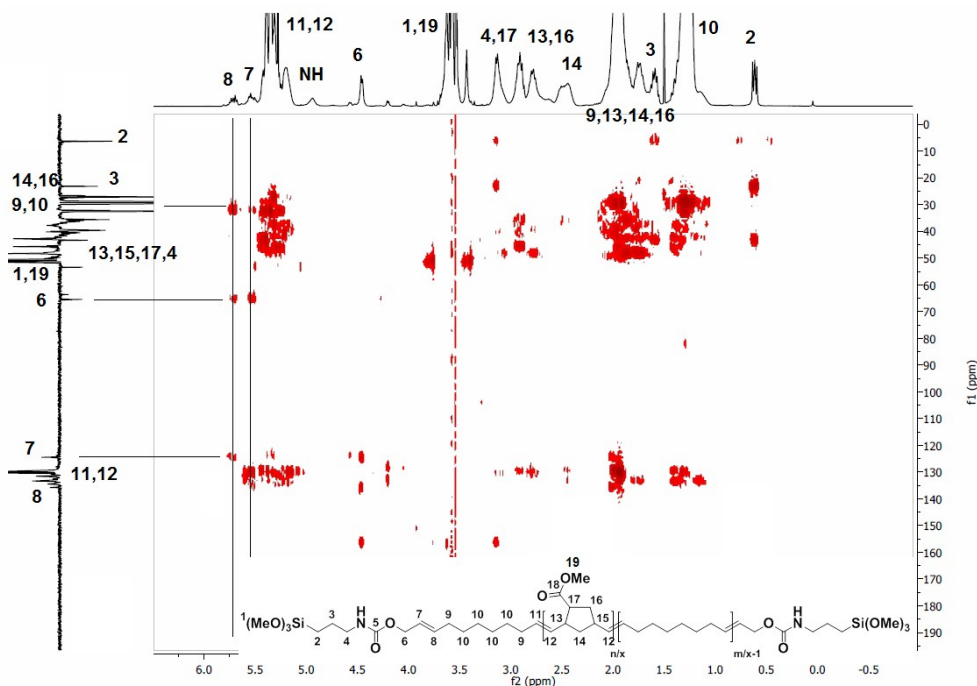

**Fig. S39.**  $^1\text{H}$ - $^{13}\text{C}$  HMBC (DEPT) NMR spectrum (400 MHz,  $\text{CDCl}_3$ , 23  $^\circ\text{C}$ ) of a crude copolymer prepared from ROMP/CM of oxanB<sup>COOMe</sup> and COE using **G2** and CTA **1** (Table 1, entry 8).

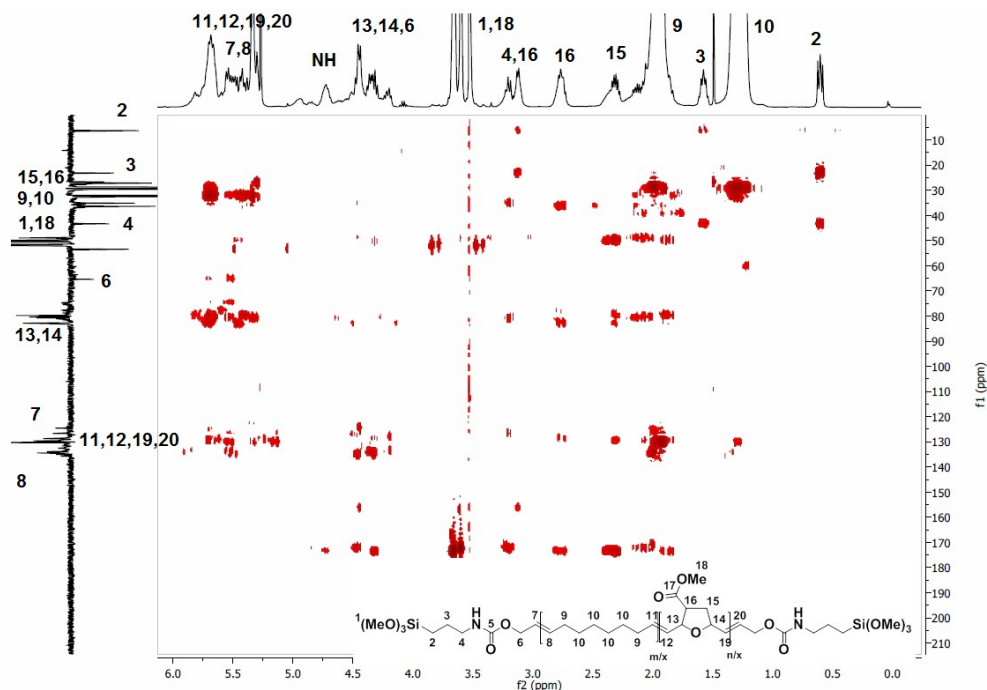

**Fig. S40.**  $^1\text{H}$ - $^{13}\text{C}$  (DEPT) HMBC NMR spectrum (400 MHz,  $\text{CDCl}_3$ , 23  $^\circ\text{C}$ ) of a crude copolymer prepared from ROMP/CM of oxanB<sup>COOMe</sup>/COE using **G2** and CTA **1** (Table 1, entry 10).

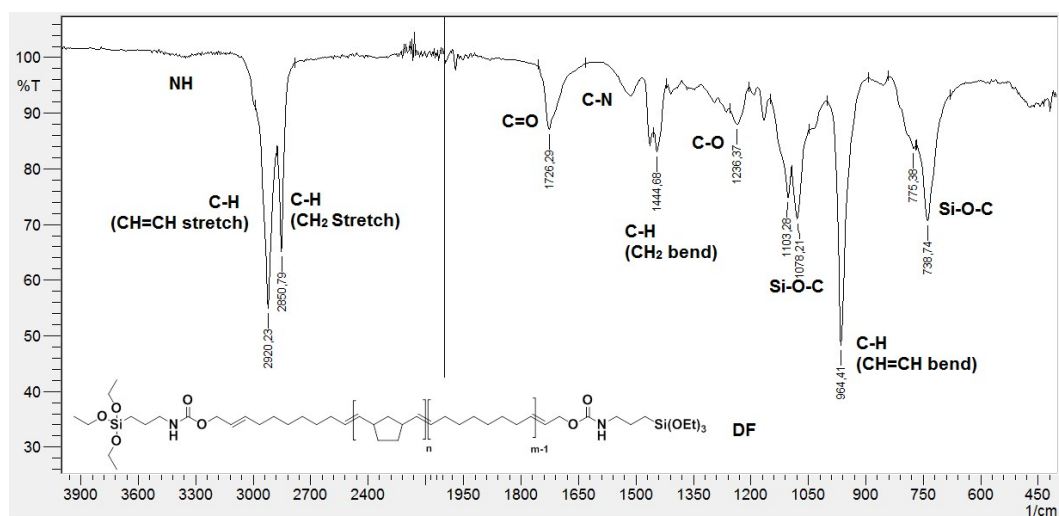

**Fig. S41.** FTIR spectrum of a crude copolymer prepared from ROMP/CM of NB and COE using **G2** and CTA **1** (Table 1, entry 1).



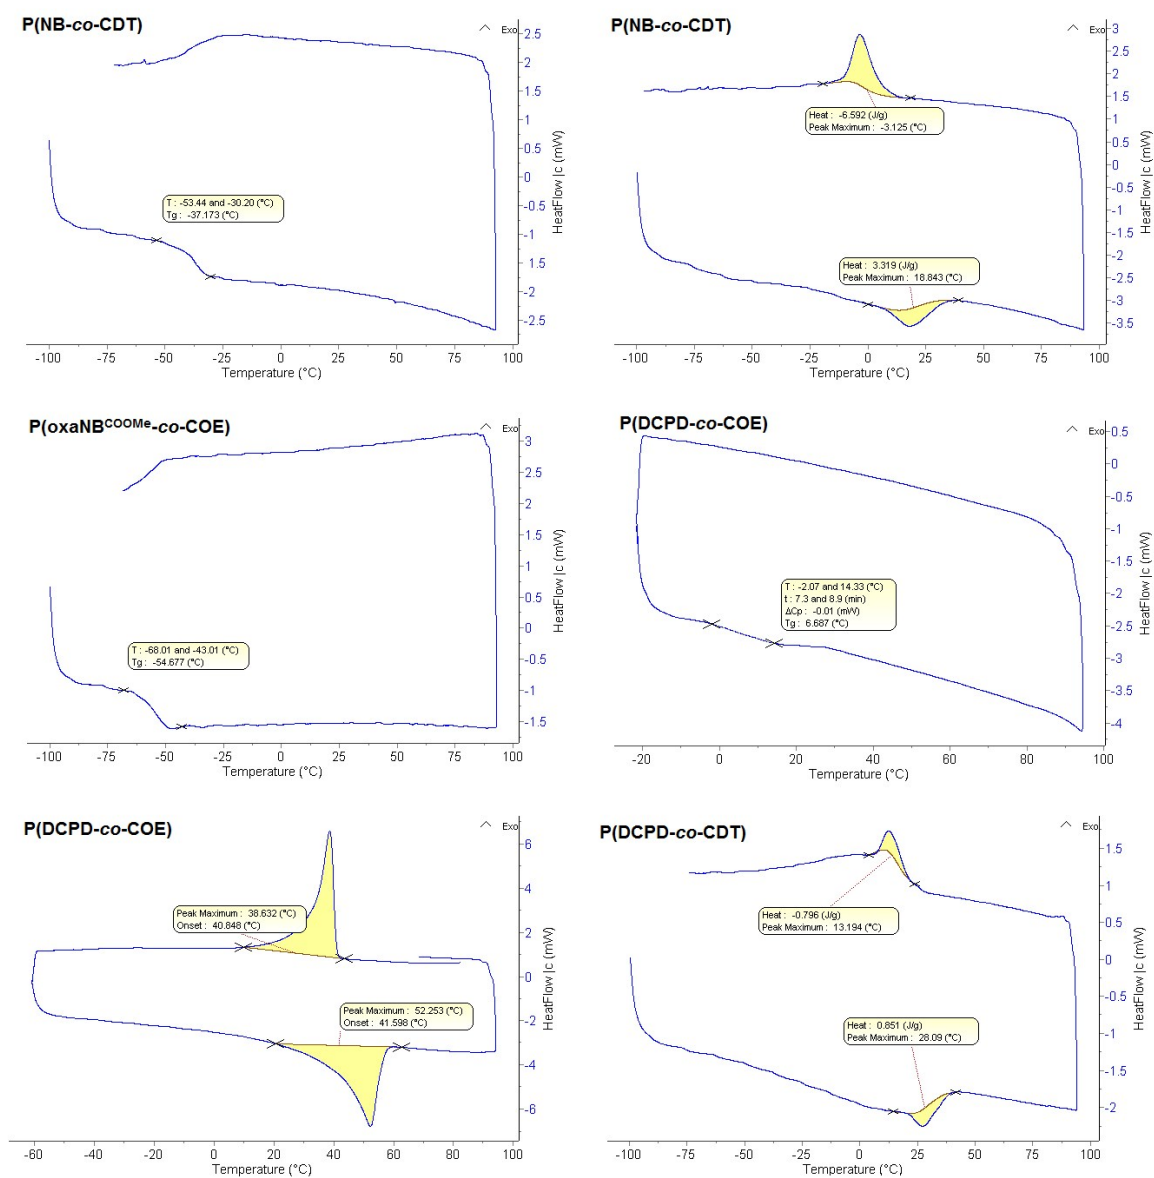

**Fig. S42.** DSC traces of copolyolefin samples prepared from the ROMP/CM of NB/CDT, oxaNB<sup>COOMe</sup>/COE, DCPD/COE and DCPD/CDT using **G2** catalyst and CTA **1** (Table 2, entries 4, 6, 19, 24, 26, 31).

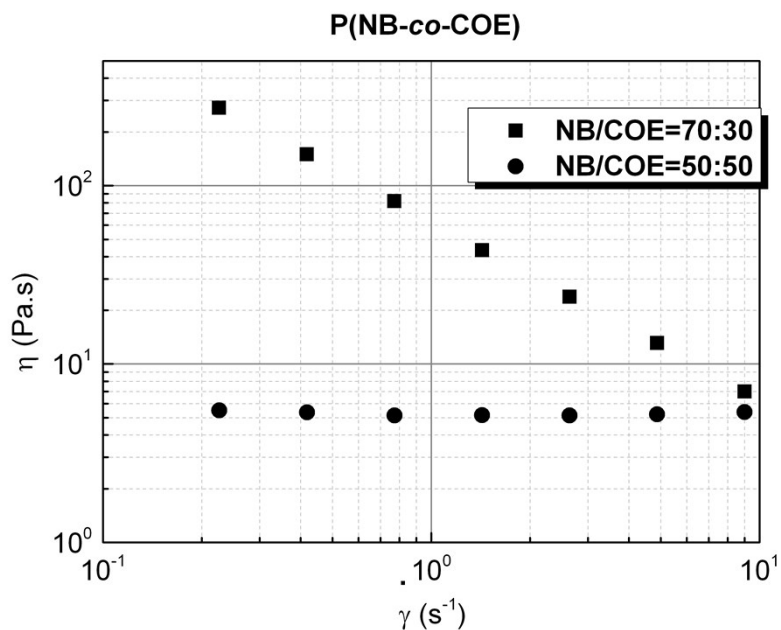

**Fig. S43.** Flow curves of copolyolefin samples prepared from the ROMP/CM of NB/COE, using **G2** catalyst and CTA **1** (Table 3, entries 1 and 2).

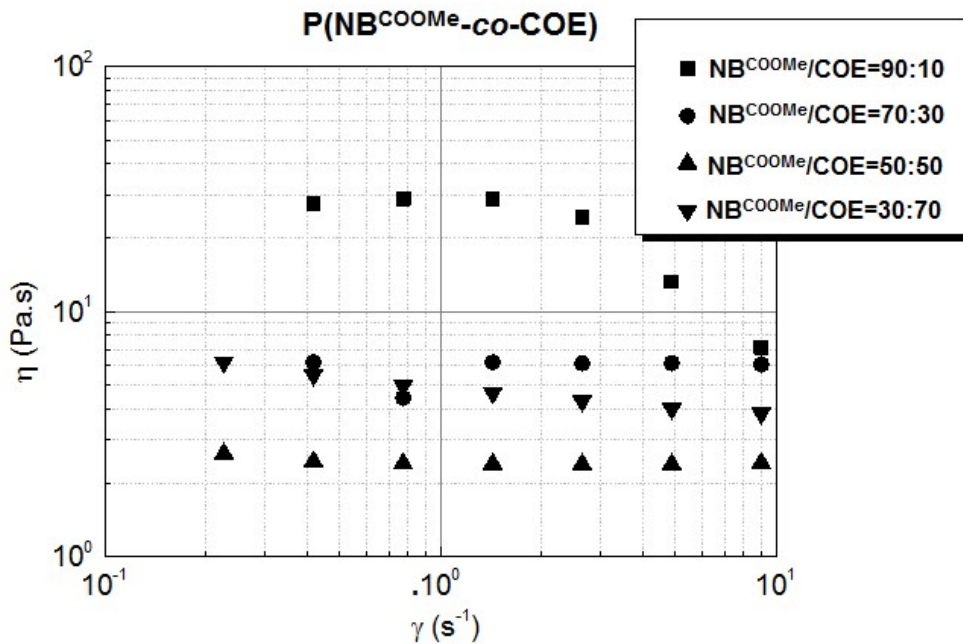

**Fig. S44.** Flow curves of copolyolefin samples prepared from the ROMP/CM of NB<sup>COOMe</sup>/COE using **G2** catalyst and CTA **1** (Table 3, entries 3–6).

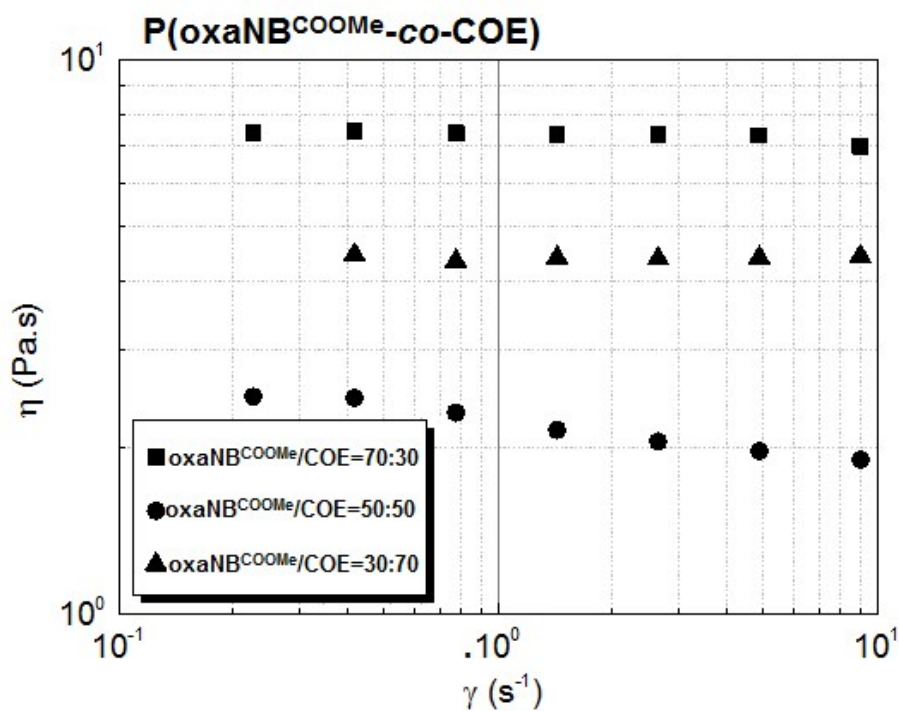

**Fig. S45.** Flow curves of copolyolefin samples prepared from the ROMP/CM of oxaNB<sup>COOMe</sup>/COE using **G2** catalyst and CTA **1** (Table 3, entries 7–9).

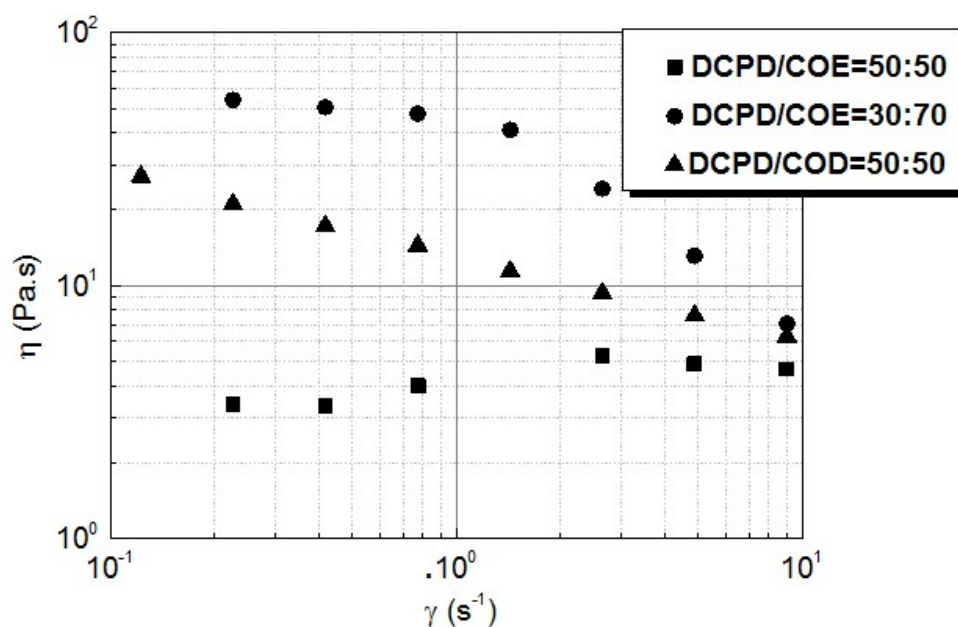

**Fig. S46.** Flow curves of copolyolefin samples prepared from the ROMP/CM of DCPD/COE and DCPD/COD using **G2** catalyst and CTA **1** (Table 3, entries 10–12).

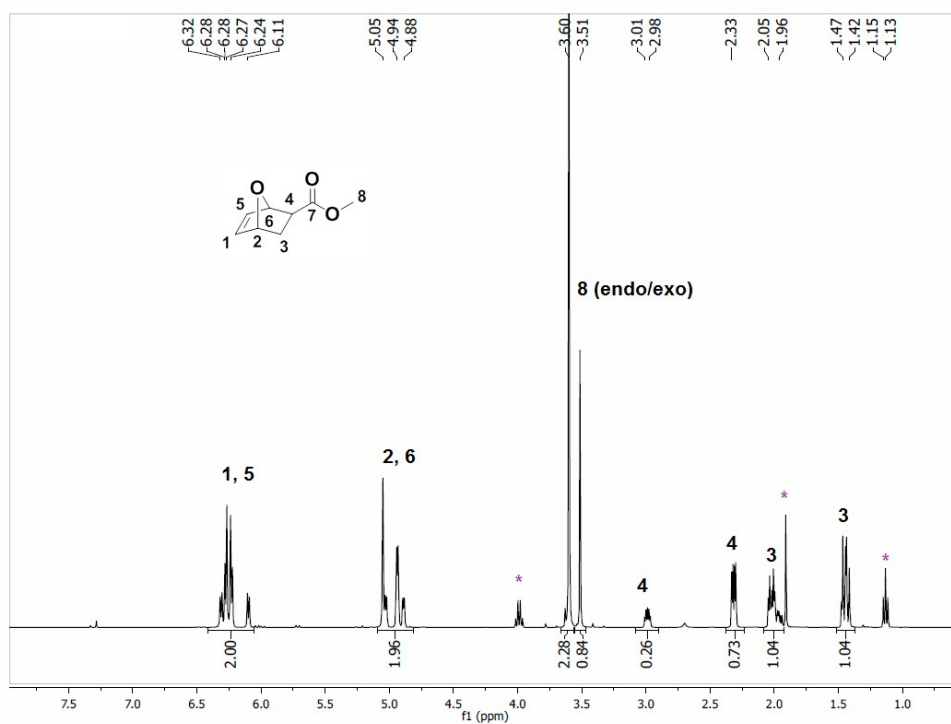

**Fig. S47.** <sup>1</sup>H NMR spectrum (500 MHz, CDCl<sub>3</sub>, 23 °C) of oxanB<sup>COOMe</sup>.

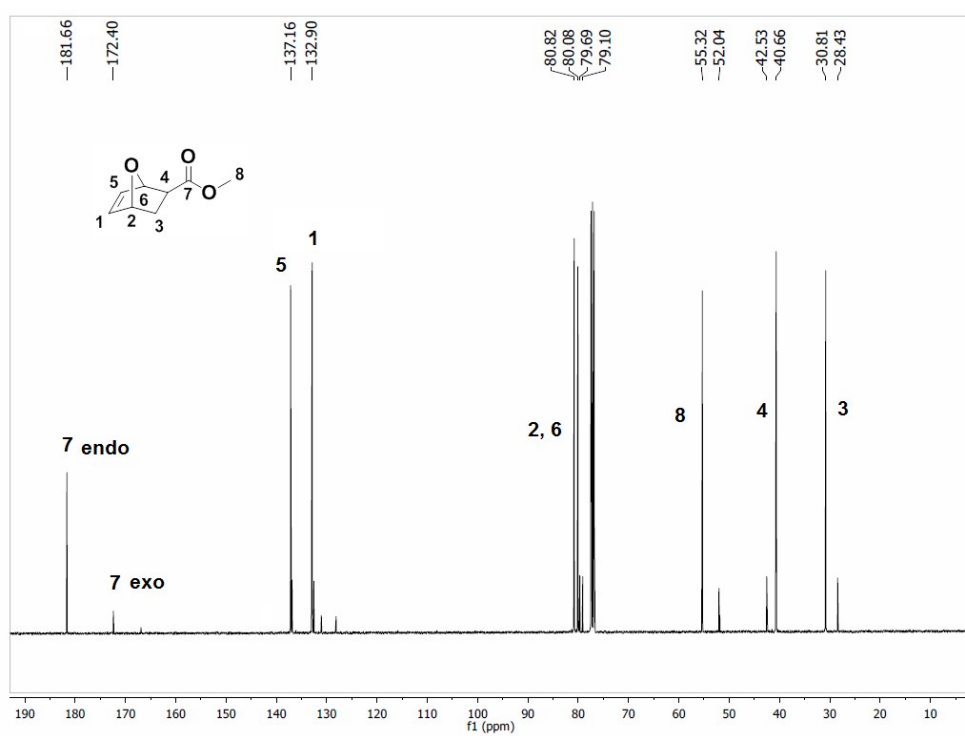

**Fig. S48.** <sup>13</sup>C{<sup>1</sup>H} NMR spectrum (125 MHz, CDCl<sub>3</sub>, 23 °C) of oxanB<sup>COOMe</sup>.
